# CONGA: Copy number variation genotyping in ancient genomes and low-coverage sequencing data

Arda Söylev<sup>1\*</sup>, Sevim Seda Çokoglu<sup>2</sup>, Dilek Koptekin<sup>3</sup>, Can Alkan<sup>4</sup>, and Mehmet Somel<sup>2\*</sup>

<sup>1</sup>*Department of Computer Engineering, Konya Food and Agriculture University, Konya, 42080, Turkey*

<sup>2</sup>*Department of Biology, Middle East Technical University, Ankara, 06800, Turkey*

<sup>3</sup>*Department of Health Informatics, Graduate School of Informatics, Middle East Technical University, Ankara, 06800, Turkey*

<sup>4</sup>*Department of Computer Engineering, Bilkent University, Ankara, 06800, Turkey*

\*Corresponding authors: [asoylev@gmail.com](mailto:asoylev@gmail.com) and [msomel@metu.edu.tr](mailto:msomel@metu.edu.tr)

## ABSTRACT

1 To date, ancient genome analyses have been largely confined to the study of single nucleotide  
2 polymorphisms (SNPs). Copy number variants (CNVs) are a major contributor of disease and of  
3 evolutionary adaptation, but identifying CNVs in ancient shotgun-sequenced genomes is hampered  
4 by typical low coverage ( $<1\times$ ) and short fragments ( $<80$  bps), precluding standard CNV detection  
5 software to be effectively applied to ancient genomes. Here we present CONGA, tailored for  
6 genotyping CNVs at low coverage. Simulations and down-sampling experiments suggest that  
7 CONGA can genotype deletions  $>1$  kbps with F-scores  $>0.75$  at  $\geq 1\times$ , and distinguish between  
8 heterozygous and homozygous states. We applied CONGA to genotype 10,002 outgroup-ascertained  
9 deletions across a heterogenous set of 71 ancient human genomes spanning the last 50,000 years,  
10 produced using variable experimental protocols. A fraction of these (21/71) display divergent deletion  
11 profiles unrelated to their population origin, but attributable to technical factors such as coverage and  
12 read length. The majority of the sample (50/71), despite originating from nine different laboratories  
13 and having coverages  $0.44\times$ - $26\times$  (median  $4\times$ ) and read lengths 52-121 bp (median 69), exhibit  
14 coherent deletion frequencies. Across these 50 genomes, inter-individual genetic diversity measured  
15 using SNPs and CONGA-genotyped deletions are strongly correlated. CONGA-genotyped deletions  
16 also display purifying selection signatures, as expected. CONGA thus paves the way for systematic  
17 CNV analyses in ancient genomes, despite the technical challenges posed by low and variable genome  
18 coverage.

19 **Keywords** Genomics · ancient DNA · CNV genotyping · deletion · low coverage whole genome sequencing

## 20 Introduction

21 Ancient genomics, the analysis of genetic material extracted from archaeological and paleontological remains, has  
22 become a major source of information for the study of population history and evolution over the last decade Skoglund  
23 and Mathieson (2018); Frantz *et al.* (2020); Shapiro and Hofreiter (2014); Marciniak and Perry (2017). While the  
24 number of published ancient genomes is exponentially growing, their analyses have yet been nearly exclusively limited  
25 to those of single-nucleotide polymorphisms (SNPs), while structural variations (SVs) in ancient genomes remain  
26 mostly ignored. Copy number variations (CNVs) are a common type of SVs and include deletions and duplications  
27 ranging from 50 bps to several megabasepairs. Although their number, by count, is much fewer than SNPs, the  
28 fraction of the genome affected by CNVs is well past that accounted for SNPs Conrad *et al.* (2010). Likewise, CNVs  
29 are a major contributor to phenotypic variation: they are frequently discovered as the basis of diverse biological  
30 adaptations Gonzalez *et al.* (2005); Perry *et al.* (2007); Xue *et al.* (2008); Chan *et al.* (2010); McLean *et al.* (2011);  
31 Hardwick *et al.* (2011); Kothapalli *et al.* (2016); Nuttle *et al.* (2016); Hsieh *et al.* (2019) as well as genetic diseases  
32 (reviewed in Zhang *et al.* (2009); Stankiewicz and Lupski (2010); Girirajan *et al.* (2011); Saitou and Gokcumen (2020)).  
33 This renders the study of CNVs in ancient genomes two-fold attractive. First, as CNVs frequently serve as genetic  
34 material for adaptation, their study in ancient genomes can allow detailed temporal investigation of adaptive processes.  
35 Examples include evolutionary changes in salivary amylase copy numbers in humans and in dogs, thought to represent

36 responses to a shift to starch-rich diets Mathieson and Mathieson (2018); Bergström *et al.* (2020). Second, large  
37 deletions can be a major source of deleterious mutation load, and studying deletion frequencies in ancient genome  
38 samples from extinct species or severely bottlenecked populations can inform about the genetic health of lineages. For  
39 instance, a study on the last surviving mammoth population on Wrangel Island reported an excess of deletions in this  
40 sample, which may have compromised the population's fitness Rogers and Slatkin (2017).

41 Despite this appeal, the impact of CNVs on evolutionary history and ancient phenotypes remains largely unex-  
42 plored Frantz *et al.* (2020). The reason lies in the significant technical challenges in CNV detection posed by ancient  
43 genomes. State-of-the-art methods for CNV discovery from shotgun genome sequencing data require at least mod-  
44 erate depth of coverage Abyzov *et al.* (2011); Boeva *et al.* (2012); Smith *et al.* (2015); Alkan (2020) and read-pair  
45 information Rausch *et al.* (2012); Layer *et al.* (2014); Chen *et al.* (2016); Einfeldt *et al.* (2017); Soylev *et al.* (2017,  
46 2019), or long reads Chaisson *et al.* (2015); Sedlazeck *et al.* (2018). However, due to the degraded and elusive nature  
47 of ancient DNA, ancient genome data is frequently produced at low coverage ( $<1\times$ ) and the molecules retrieved are  
48 typically short, between 50-80 bps. Excess variability in genome coverage caused by taphonomic processes is another  
49 potential issue. Although CNVs have been studied in a few relatively high coverage ancient genomes using CNV  
50 discovery tools Green *et al.* (2010); Reich *et al.* (2010); Meyer *et al.* (2012); Rogers and Slatkin (2017); Bergström  
51 *et al.* (2020), these methods are inapplicable to most ancient genome data sets, and so far, no specific algorithm for  
52 CNV identification in ancient genomes has been developed and tested.

53 With the aim to fill this gap, here we present CONGA (Copy Number Variation Genotyping in Ancient Genomes and  
54 Low-coverage Sequencing Data), a CNV genotyping algorithm tailored for ancient and other low coverage genomes,  
55 which estimates copy number beyond presence/absence of events. We use simulations and down-sampling experiments  
56 to assess CONGA's performance. Beyond simulations, we explore whether deletions can be reliably genotyped in  
57 heterogeneous datasets composed of ancient genomes from different laboratories, where not only low coverage, but  
58 also coverage variability caused by differences in taphonomy and experimental protocols may pose challenges. We  
59 evaluate this by studying expected patterns of genetic drift and negative selection on CONGA-genotyped deletions.

## 60 Results

### 61 Motivation and overview of the algorithm

62 We developed CONGA to genotype given candidate CNVs in mapped read (BAM) files (Methods). The choice of  
63 CNV genotyping over CNV discovery has obvious reasons: (a) CNV discovery using low coverage ancient genomes is  
64 impractical; (b) for many species studied using ancient genomics, CNV reference sets based on high quality genomes  
65 are already available (Supplemental Note S1); (c) variants in ancient genomes will largely overlap with present-day  
66 variants in most cases; (d) genotyping has much shorter running times and lower memory usage than discovery. Indeed,  
67 although algorithms for *de novo* SNP discovery exist Prüfer (2018); Link *et al.* (2017), most ancient genome studies to  
68 date have chosen genotyping known variants because of low coverage and DNA damage Orlando *et al.* (2021). We  
69 reasoned that it may be likewise possible to genotype CNVs in ancient genomes with high accuracy and in short running  
70 times using depth of coverage and split-read information, despite low and variable coverage.

71 Briefly, CONGA first calculates the number of reads mapped to each given interval in the reference genome, which  
72 we call "observed read-depth". It then calculates the "expected diploid read-depth", i.e., the GC-content normalized  
73 read-depth given the genome average. Using these values, CONGA calculates the likelihood for each genotype by  
74 modeling the read-depth distribution as Poisson, similar to common CNV callers Xie and Tammi (2009); Chiang *et al.*  
75 (2009); Yoon *et al.* (2009). The genotypes can be homozygous CNV, heterozygous CNV, or no CNV. Using these  
76 likelihoods CONGA then calculates a statistic we term the C-score, defined as the likelihood of a CNV being true (in  
77 heterozygous or homozygous state) over it being false (no CNV). For genotyping duplications, CONGA also uses an  
78 additional split-read step in order to utilize paired-end information. Briefly, it splits reads and remaps the split within  
79 the genome, treating the two segments as paired-end reads Karakoc *et al.* (2012); Soylev *et al.* (2019). Either type of  
80 signature, read-depth or paired-end, can be sufficient to call a duplication (Methods). The overall workflow is presented  
81 in Figure 1.

### 82 Accuracy evaluation using simulated genomes and comparison with published algorithms

83 To evaluate the performance of CONGA we first simulated genomes with CNVs of ancient-like characteristics. We  
84 employed VarSim Mu *et al.* (2015) to insert deletions and duplications into the human reference genome (GRCh37).  
85 We used three different size intervals for CNVs: small (100 bps - 1000 bps), medium (1,000 bps - 10,000 bps) and  
86 large (10,000 bps - 100,000 bps). We thus simulated three genomes, each with roughly 1,500 deletions and 1,500  
87 duplications of a specific size range (see Supplemental Fig. S1 for the exact numbers and length distributions of CNVs

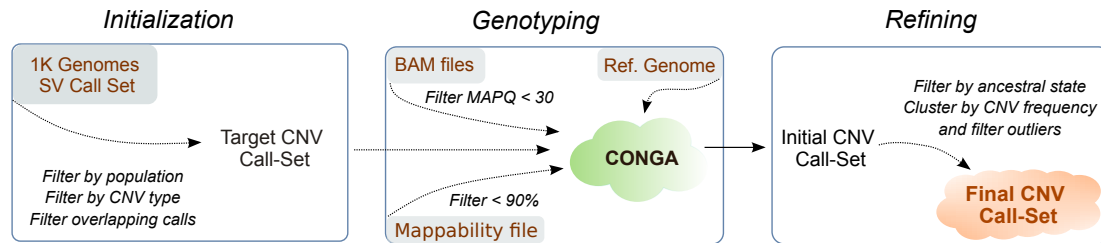

Figure 1: Overall workflow of CONGA. The first step involves initialization, where we create the input (reference) CNV file using the deletions and duplications of a high quality genome set. We apply our genotyping algorithm in the second step and create the initial CNV call set. We then perform a filtering and refining step, which is used to generate the final CNV call set.

88 inserted in each genome). We next used these genomes as input to the ancient read simulator Gargammel Renaud *et al.*  
89 (2017), which generates paired-end short Illumina reads with varying fragment sizes (median 66 bps) and post-mortem  
90 damage. The data was generated at various depths: 0.05 $\times$ , 0.1 $\times$ , 0.5 $\times$ , 1 $\times$  and 5 $\times$  (Methods). We then used CONGA  
91 to genotype CNVs across the simulated ancient genomes, using a candidate CNV call set. In order to assess specificity  
92 and sensitivity, we also used a background (false) CNV list, prepared using published deletion and duplication calls  
93 from modern-day human long-read sequencing datasets Audano *et al.* (2019); Chaisson *et al.* (2019); Zook *et al.* (2020);  
94 Collins *et al.* (2020), as well as from African populations (AFR) from Phase 3 of the 1000 Genomes Project Sudmant  
95 *et al.* (2015b). We mixed these false CNVs to the list of true CNVs with a ratio of approximately 10:1 (~15,000  
96 false events vs. ~1,500 true events) and used this mixed list as the candidate CNV call set to CONGA (Methods).  
97 To assess the performance of CONGA in identifying CNVs, we further compared it with a CNV genotyping tool,  
98 GenomeSTRiP Handsaker *et al.* (2011, 2015), and three of the widely used CNV discovery tools: CNVnator Abyzov  
99 *et al.* (2011), FREEC Boeva *et al.* (2012) and mrCaNaVaR Alkan *et al.* (2009); Kahveci and Alkan (2018); Alkan  
100 (2020).

101 Table 1 shows true and false predictions by CONGA, GenomeSTRiP, FREEC and CNVnator, as well as their true  
102 positive rate (TPR), false discovery rate (FDR) and the F-score (F1) for identifying deletions and duplications of small,  
103 medium and large size (as defined above). We report results with mrCaNaVaR separately in Supplemental Table S1.A  
104 as this algorithm was specifically designed to target large duplications (>10 kbps) only.

105 Both genotypers, CONGA and GenomeSTRiP, achieved higher performance compared to the three CNV discovery  
106 tools (Table 1; Supplemental Table S1.A). Although this may seem expected, the fact that our candidate CNV call set  
107 included 10 times more false CNVs than true CNVs is notable, and indicates that both CONGA and GenomeSTRiP  
108 achieve non-trivial performances in distinguishing true versus false CNVs in ancient genomes.

109 CONGA and GenomeSTRiP had comparable performances, although CONGA had lower FDR and slightly lower recall  
110 (TPR) than the latter, leading to overall higher F-scores. We note that GenomeSTRiP was performed on each genome  
111 independently here, and its performance when genotyping multiple genomes together could be higher Handsaker *et al.*  
112 (2011). However, joint genotyping may also create biases in heterogeneous datasets (see Discussion).

113 We observed that all tools converge in performance as the coverage approaches depths of 5 $\times$ , especially with large  
114 CNVs. For small CNVs (<1 kbps), all tools under-performed, although CONGA predictions still had higher recall and  
115 precision than the other tools (see Supplemental Fig. S2 for precision-recall curves).

116 The simulation results thus suggest that CONGA can efficiently and accurately genotype deletions and duplications of  
117 length >1 kbps in ancient genomes at  $\geq 0.5\times$  coverage, with higher overall accuracy compared to available discovery  
118 and genotyping tools.

### 119 Copy number predictions of CNVs

120 Beyond the identification of deletion and duplication events, classifying individual genotypes as heterozygous or  
121 homozygous CNVs could provide valuable information for population genetic analyses of CNVs. However, predicting  
122 CNV copy numbers can be a significant challenge on low coverage genomes Kousathanas *et al.* (2017). We thus  
123 assessed the performance of CONGA to determine the copy number of a CNV based on the likelihood model described  
124 above using our simulation data. We focused on medium and large size CNVs given the weak performance of CONGA  
125 on small CNVs. We note that CONGA only evaluates the possibility of homozygous duplications (ignores copy numbers

Table 1: Summary of simulation predictions by CONGA, GenomeSTRiP, FREEC and CNVnator.

|                                 | Cov. | CONGA |      |             |             |             | GenomeSTRiP |      |             |      |      | FREEC |      |      |      |      | CNVnator |       |      |             |      |
|---------------------------------|------|-------|------|-------------|-------------|-------------|-------------|------|-------------|------|------|-------|------|------|------|------|----------|-------|------|-------------|------|
|                                 |      | T     | F    | TPR         | FDR         | F1          | T           | F    | TPR         | FDR  | F1   | T     | F    | TPR  | FDR  | F1   | T        | F     | TPR  | FDR         | F1   |
| Dels<br>(small)<br>1810<br>True | .05x | 1471  | 1887 | <b>0.81</b> | <b>0.56</b> | <b>0.57</b> | 829         | 6308 | 0.46        | 0.88 | 0.19 | 0     | 1221 | 0.00 | 1.00 | -    | 3        | 47442 | 0.00 | 1.00        | 0.00 |
|                                 | .1x  | 1266  | 1440 | <b>0.70</b> | <b>0.53</b> | <b>0.56</b> | 851         | 4765 | 0.47        | 0.85 | 0.23 | 0     | 198  | 0.00 | 1.00 | -    | 0        | 402   | 0.00 | 1.00        | -    |
|                                 | .5x  | 1285  | 157  | <b>0.71</b> | <b>0.11</b> | <b>0.79</b> | 853         | 1549 | 0.47        | 0.64 | 0.41 | 0     | 6761 | 0.00 | 1.00 | -    | 0        | 806   | 0.00 | 1.00        | -    |
|                                 | 1x   | 1410  | 46   | <b>0.78</b> | <b>0.03</b> | <b>0.86</b> | 888         | 719  | 0.49        | 0.45 | 0.52 | 0     | 1916 | 0.00 | 1.00 | -    | 0        | 263   | 0.00 | 1.00        | -    |
|                                 | 5x   | 1593  | 8    | <b>0.88</b> | <b>0.00</b> | <b>0.93</b> | 917         | 89   | 0.51        | 0.09 | 0.65 | 20    | 392  | 0.01 | 0.95 | 0.02 | 341      | 493   | 0.19 | 0.59        | 0.26 |
| Dups<br>(small)<br>1751<br>True | .05x | 601   | 548  | 0.34        | <b>0.48</b> | <b>0.41</b> | 829         | 3834 | <b>0.47</b> | 0.82 | 0.26 | 0     | 44   | 0.00 | 1.00 | -    | 7        | 47700 | 0.00 | 1.00        | 0.00 |
|                                 | .1x  | 719   | 404  | 0.41        | <b>0.36</b> | <b>0.50</b> | 1048        | 2691 | <b>0.60</b> | 0.72 | 0.38 | 0     | 7    | 0.00 | 1.00 | -    | 0        | 28699 | 0.00 | 1.00        | -    |
|                                 | .5x  | 856   | 64   | 0.49        | <b>0.07</b> | <b>0.64</b> | 1077        | 686  | <b>0.62</b> | 0.39 | 0.61 | 0     | 3    | 0.00 | 1.00 | -    | 0        | 9     | 0.00 | 1.00        | -    |
|                                 | 1x   | 1155  | 14   | <b>0.66</b> | <b>0.01</b> | <b>0.79</b> | 1127        | 311  | 0.64        | 0.22 | 0.71 | 0     | 555  | 0.00 | 1.00 | -    | 0        | 884   | 0.00 | 1.00        | -    |
|                                 | 5x   | 1448  | 1    | <b>0.83</b> | 0.00        | <b>0.91</b> | 888         | 1270 | 0.73        | 0.05 | 0.82 | 35    | 77   | 0.02 | 0.69 | 0.04 | 2        | 0     | 0.00 | <b>0.00</b> | 0.00 |
| Dels<br>(med.)<br>1680<br>True  | .05x | 1136  | 1704 | 0.68        | <b>0.60</b> | <b>0.50</b> | 1430        | 5670 | <b>0.85</b> | 0.80 | 0.33 | 0     | 83   | 0.00 | 1.00 | -    | 0        | 68    | 0.00 | 1.00        | -    |
|                                 | .1x  | 1273  | 1308 | 0.76        | <b>0.51</b> | <b>0.60</b> | 1452        | 4383 | <b>0.86</b> | 0.75 | 0.39 | 0     | 237  | 0.00 | 1.00 | -    | 1        | 216   | 0.00 | 1.00        | 0.00 |
|                                 | .5x  | 1423  | 171  | 0.85        | <b>0.11</b> | <b>0.87</b> | 1495        | 1467 | <b>0.89</b> | 0.50 | 0.64 | 239   | 6433 | 0.14 | 0.96 | 0.06 | 187      | 257   | 0.11 | 0.58        | 0.18 |
|                                 | 1x   | 1506  | 53   | <b>0.90</b> | <b>0.03</b> | <b>0.93</b> | 1501        | 699  | 0.89        | 0.32 | 0.77 | 421   | 2135 | 0.25 | 0.84 | 0.20 | 330      | 257   | 0.20 | 0.44        | 0.29 |
|                                 | 5x   | 1569  | 9    | <b>0.93</b> | <b>0.01</b> | <b>0.96</b> | 1510        | 102  | 0.90        | 0.06 | 0.92 | 929   | 485  | 0.55 | 0.34 | 0.60 | 949      | 423   | 0.56 | 0.31        | 0.62 |
| Dups<br>(med.)<br>1684<br>True  | .05x | 792   | 551  | 0.47        | <b>0.41</b> | <b>0.52</b> | 1104        | 3813 | <b>0.66</b> | 0.78 | 0.33 | 0     | 3    | 0.00 | 1.00 | -    | 0        | 114   | 0.00 | 1.00        | -    |
|                                 | .1x  | 950   | 422  | 0.56        | <b>0.31</b> | <b>0.62</b> | 1160        | 2701 | <b>0.69</b> | 0.70 | 0.42 | 0     | 3    | 0.00 | 1.00 | -    | 0        | 102   | 0.00 | 1.00        | -    |
|                                 | .5x  | 1340  | 60   | <b>0.80</b> | <b>0.04</b> | <b>0.87</b> | 1322        | 685  | 0.79        | 0.34 | 0.72 | 271   | 15   | 0.16 | 0.05 | 0.28 | 2        | 4     | 0.00 | 0.67        | 0.00 |
|                                 | 1x   | 1451  | 11   | <b>0.86</b> | <b>0.01</b> | <b>0.92</b> | 1389        | 333  | 0.82        | 0.19 | 0.82 | 582   | 937  | 0.35 | 0.62 | 0.36 | 16       | 2     | 0.01 | 0.11        | 0.02 |
|                                 | 5x   | 1553  | 1    | <b>0.92</b> | <b>0.00</b> | <b>0.96</b> | 1473        | 95   | 0.87        | 0.06 | 0.91 | 1000  | 329  | 0.59 | 0.25 | 0.66 | 105      | 2     | 0.06 | 0.02        | 0.12 |
| Dels<br>(large)<br>1385<br>True | .05x | 1208  | 1812 | 0.87        | <b>0.60</b> | <b>0.55</b> | 1330        | 5891 | <b>0.96</b> | 0.82 | 0.31 | 0     | 87   | 0.00 | 1.00 | -    | 84       | 131   | 0.06 | 0.61        | 0.11 |
|                                 | .1x  | 1251  | 1309 | 0.90        | 0.51        | <b>0.63</b> | 1337        | 4371 | <b>0.97</b> | 0.77 | 0.38 | 0     | 754  | 0.00 | 1.00 | -    | 560      | 246   | 0.40 | <b>0.31</b> | 0.51 |
|                                 | .5x  | 1293  | 157  | 0.93        | <b>0.11</b> | <b>0.91</b> | 1335        | 1496 | <b>0.96</b> | 0.53 | 0.63 | 664   | 3136 | 0.48 | 0.83 | 0.26 | 1049     | 293   | 0.76 | 0.22        | 0.77 |
|                                 | 1x   | 1299  | 53   | 0.94        | <b>0.04</b> | <b>0.95</b> | 1338        | 759  | <b>0.97</b> | 0.36 | 0.77 | 1239  | 156  | 0.89 | 0.11 | 0.89 | 1204     | 309   | 0.87 | 0.20        | 0.83 |
|                                 | 5x   | 1299  | 4    | 0.94        | <b>0.00</b> | <b>0.97</b> | 1336        | 230  | <b>0.96</b> | 0.15 | 0.91 | 1260  | 154  | 0.91 | 0.11 | 0.90 | 1265     | 453   | 0.91 | 0.26        | 0.82 |
| Dups<br>(large)<br>1532<br>True | .05x | 1263  | 563  | 0.82        | <b>0.31</b> | <b>0.75</b> | 1271        | 3900 | <b>0.83</b> | 0.75 | 0.38 | 0     | 6    | 0.00 | 1.00 | -    | 4        | 354   | 0.00 | 0.99        | 0.00 |
|                                 | .1x  | 1327  | 366  | <b>0.87</b> | <b>0.22</b> | <b>0.82</b> | 1327        | 2855 | <b>0.87</b> | 0.68 | 0.46 | 0     | 0    | -    | -    | -    | 455      | 315   | 0.30 | 0.41        | 0.40 |
|                                 | .5x  | 1420  | 58   | 0.93        | <b>0.04</b> | <b>0.94</b> | 1424        | 964  | <b>0.93</b> | 0.40 | 0.73 | 589   | 97   | 0.38 | 0.14 | 0.53 | 1039     | 77    | 0.68 | 0.07        | 0.78 |
|                                 | 1x   | 1426  | 20   | 0.93        | <b>0.01</b> | <b>0.96</b> | 1445        | 623  | <b>0.94</b> | 0.30 | 0.80 | 1305  | 266  | 0.85 | 0.17 | 0.84 | 1216     | 94    | 0.79 | 0.07        | 0.86 |
|                                 | 5x   | 1428  | 9    | 0.93        | <b>0.01</b> | <b>0.96</b> | 1447        | 454  | <b>0.94</b> | 0.24 | 0.84 | 1304  | 294  | 0.85 | 0.18 | 0.83 | 1350     | 165   | 0.88 | 0.11        | 0.89 |

The table shows CNV prediction performances of CONGA, GenomeSTRiP, FREEC and CNVnator on simulated genomes with depths 0.05x, 0.1x, 0.5x, 1x and 5x, for deletions (Dels) and duplications (Dups) of multiple CNV size intervals including 100 bps - 1 kbps (small), 1 kbps - 10 kbps (medium) and 10 kbps - 100 kbps (large). Here, **T** (True) and **F** (False) refer to correct and incorrect predictions respectively, **TPR** is true positive rate (or recall) and **FDR** is false discovery rate ( $1 - \text{Precision}$ ) of each algorithm. **F1** (F-score), is calculated as  $(2 \times \text{Precision} \times \text{Recall}) / (\text{Precision} + \text{Recall})$ . Bold values in each row represent the highest TPR, lowest FDR, or highest F1 across the tools. See Supplemental Table S1.A for details and mrCaNaVaR predictions for large variations. Commands that we used to run each tool are also given in Supplemental Material. The results here were generated using C-Score <0.5 for CONGA, while no read-pair or mappability filters were applied.

126  $\geq 3$ ). Figure 2 shows CONGA's copy number prediction performance for deletions and duplications using F-scores  
 127 for each coverage tested. We found that F-scores were above 0.7 at coverages  $\geq 0.5x$ . Encouragingly, CONGA had  
 128 comparable power in identifying heterozygous and homozygous events of size  $>1$  kbps (Supplemental Table S1.B).

## 129 Down-sampling experiments with real ancient genomes

130 We next studied the performance of CONGA in identifying CNVs at various depths of coverage using real ancient  
 131 genome data. As no ground truth CNV call-set is available, we used the following approach: (i) we chose three  
 132 published ancient genomes of relatively high coverage ( $\geq 9x$ ), (ii) we genotyped CNVs using the full genome data with  
 133 CONGA and using a modern-day human CNV call set as input, (iii) we down-sampled the ancient genome data to  
 134 lower coverages, (iv) we assessed CONGA's performance in genotyping the same CNVs at low coverage (Methods).

135 Specifically, we selected a ( $\sim 23.3x$ ) ancient Eurasian genome (Yamnaya) de Barros Damgaard *et al.* (2018b), a  
 136  $13.1x$  ancient genome from Greenland (Saqqaq) Rasmussen *et al.* (2010), and a  $9.6x$  ancient genome from Ethiopia  
 137 (Mota) Llorente *et al.* (2015). The Yamnaya genome was only available as a BAM file, while the latter two were



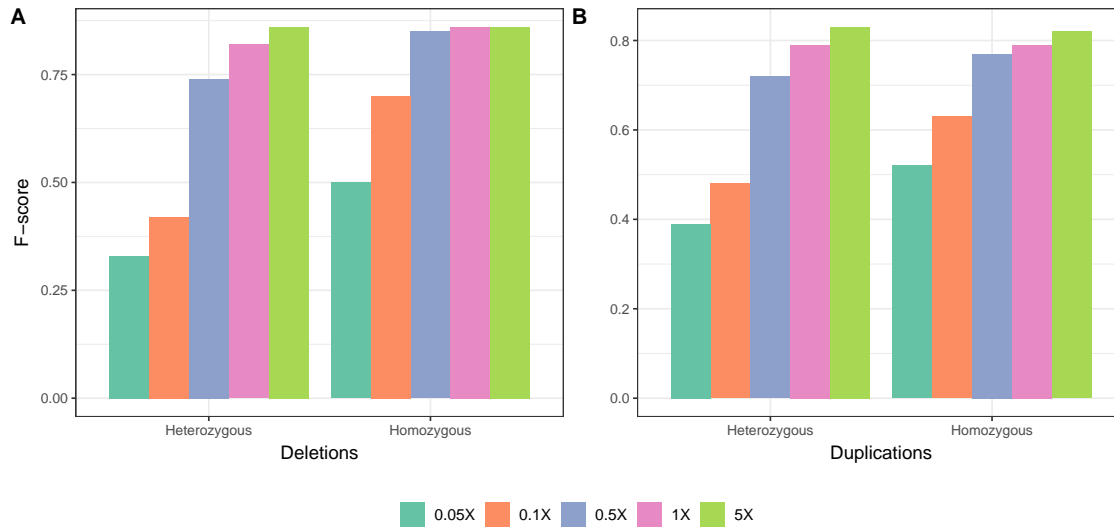

Figure 2: Performance (F-scores) of CONGA in predicting copy-numbers of (A) deletions and (B) duplications using merged sets of medium and large CNVs, at various coverage values.

138 available as FASTQ files, which we processed into BAM files (Methods). We used a list of modern-day human CNVs  
139 as candidate CNV set ( $n = 17,392$  deletions and  $n = 14,888$  duplications) (Methods) as input to CONGA. We thus  
140 genotyped between 688-1,581 deletions and 638-4,097 duplications across these three genomes using the full data. We  
141 then down-sampled all three BAM files to various depths, and repeated the genotyping for each genome. We estimated  
142 CONGA's TPR and FDR on down-sampled genomes by treating the CNVs genotyped using the full data as ground  
143 truth (Methods).

144 CONGA displayed satisfactory performance in identifying deletions in all three genomes even at coverages around  
145  $0.5\times$ , with TPR of  $>70\%$  and FDR of  $<45\%$  (Figure 3, Supplemental Table S1.C). For duplications, however, CONGA  
146 showed poor performance: at around  $1\times$  coverage, duplication TPR was  $>40\%$  in the Saqqaq and Mota genomes, and  
147 only  $22\%$  in the Yamnaya genome. A detailed analysis of these results suggested that pre-publication quality filtering  
148 of BAM files may have obliterated read-depth-based duplication signals in the data (Supplemental Note S2).

149 Overall, both our simulations and down-sampling experiments with real genomes suggest that CONGA can efficiently  
150 genotype  $>1$  kbps deletion events at depths of coverage of  $0.5\times$ , and even at  $0.1\times$ . CONGA could thus be applied on a  
151 large fraction of ancient shotgun sequenced genomes available for deletion genotyping. In contrast, CONGA's low  
152 performance in duplication genotyping in the down-sampled Yamnaya BAM data implies that identifying duplications  
153 in published low coverage ancient genomes may not be feasible, as the data are mainly submitted in BAM format in  
154 public repositories (see Discussion). We therefore limited downstream analyses on real ancient genomes to deletions  
155  $>1$  kbps.

## 156 Analysis of 71 real ancient genomes and technical influences on deletion genotyping

157 Although CONGA's above performance in deletion genotyping was promising, heterogeneous sets of real ancient  
158 genomes may pose additional challenges, as they are obtained from DNA samples of complex taphonomic history and  
159 are produced via different experimental protocols. Hence, whether consistent biological signals may still be extracted  
160 from low coverage genome sets remains unclear. To explore this, we genotyped deletions with CONGA across a  
161 diverse sample of real ancient human genomes. We then studied their diversity with expectation that deletions, like  
162 SNPs, should display genome-wide similarity patterns that reflect population origin, i.e., shared genetic drift, among  
163 individuals Conrad and Hurler (2007); Levy-Sakin *et al.* (2019); Almarri *et al.* (2020).

164 We thus collected BAM files for 71 ancient human genomes belonging to a time range between c.2,800-45,000 years  
165 Before Present (BP) (Supplemental Table S2) Rasmussen *et al.* (2014); Günther *et al.* (2015); Hofmanová *et al.* (2016);  
166 Jones *et al.* (2015); Kiliç *et al.* (2016); de Barros Damgaard *et al.* (2018b); Gamba *et al.* (2014); González-Fortes *et al.*  
167 (2017); de Barros Damgaard *et al.* (2018a); Keller *et al.* (2012); Sikora *et al.* (2019); Olalde *et al.* (2014); Lazaridis  
168 *et al.* (2014); Antonio *et al.* (2019); Allentoft *et al.* (2015); Haber *et al.* (2019); Fu *et al.* (2014); Broushaki *et al.* (2016);  
169 Seguin-Orlando *et al.* (2014); Jones *et al.* (2017); Haber *et al.* (2017); Raghavan *et al.* (2014); Martiniano *et al.* (2017);

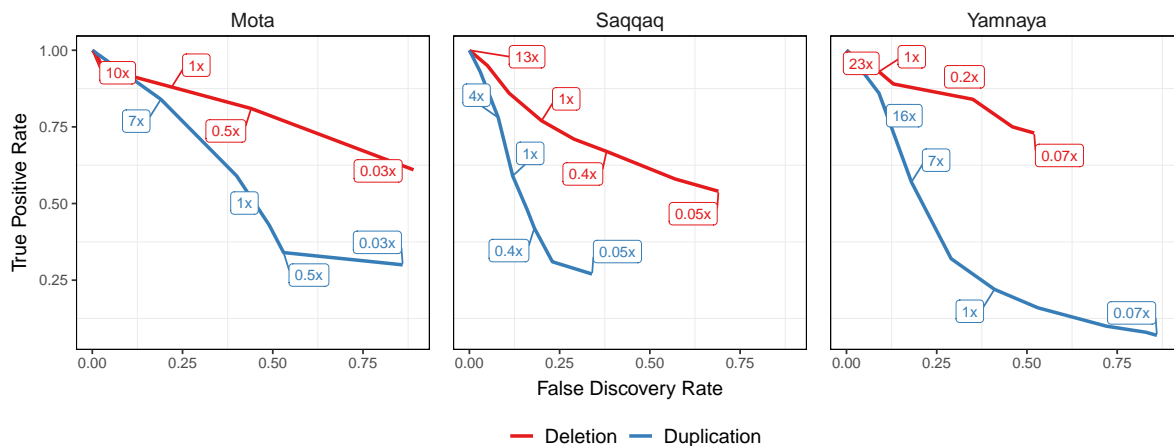

Figure 3: TPR vs FDR curves for deletion and duplication predictions of CONGA using Mota, Saqqaq and Yamnaya genomes down-sampled to various depths from their original coverages of  $9.6\times$ ,  $13.1\times$  and  $23.3\times$ , respectively. The numbers inside boxes show the down-sampled coverage values. We calculated TPR and FDR for down-sampled genomes assuming that our CONGA-based predictions with the original genomes (full data) reflect the ground truth. These predictions, in turn, were made using modern-day CNVs as candidate CNV list. The purpose of the experiment was to evaluate accuracy at lower coverage relative to the full data (Methods).

170 Krzewińska *et al.* (2018); Yaka *et al.* (2021). These were chosen to bear diverse characteristics, including a wide range  
 171 in mean coverage ( $0.04\times$ - $26\times$ , median =  $3.45\times$ ), population origin (West and East Eurasia and North America), the  
 172 laboratory of origin (10 different laboratories), the use of shotgun vs. whole-genome capture protocols, or the use of  
 173 uracil-DNA-glycosylase (UDG) treatment Rohland *et al.* (2015). For genotyping, we used a candidate CNV dataset of  
 174 11,390 autosomal deletions ( $>1$  kbps with mean 10,735 bps) identified among African populations (AFR) from Phase 3  
 175 of the 1000 Genomes Project Sudmant *et al.* (2015b) (Methods). Our motivation for using an African sample here was  
 176 to avoid ascertainment bias Clark *et al.* (2005) in studying deletion frequencies, as all of the 71 ancient individuals were  
 177 non-African, and thus African populations represent an outgroup to our sample set. We further filtered these for high  
 178 mappability (mean  $>0.9$ ) and to be derived in the human lineage using chimpanzee and bonobo genomes to represent  
 179 the ancestral state, leaving us with 10,002 deletion events (Methods).

180 Genotyping the 10,002 loci across 71 BAM files, we found 8,780 (88%) genotyped in at least one genome (as deletion  
 181 or reference). Further, 5,467 (55%) loci genotyped as a deletion (in heterozygous or homozygous state) at least once.  
 182 Across the 71 genomes, we detected a median number of 490 deletion events [396-2,648] again in either heterozygous  
 183 or homozygous state.

184 We studied deletion copy number (frequency) variation across these 71 ancient genomes using a battery of heatmaps,  
 185 hierarchical clustering, multidimensional scaling plots (MDS) and principal components analysis (PCA) (Supplemental  
 186 Fig. S3; Supplemental Fig. S4). This revealed a minority of genomes exhibiting highly divergent frequencies, without  
 187 obvious association with their population of origin. Given the close evolutionary relationship among Eurasian human  
 188 populations, we reasoned that these divergent signals most likely originate from experimental artifacts, data processing  
 189 artifacts, or variability of DNA preservation among samples. Supporting this, mean deletion frequencies across the  
 190 71 genomes could be explained by laboratory-of-origin (Kruskall-Wallis test,  $p = 0.08$ ). We identified a subset of  
 191 21 divergent, or outlier genomes, and removing these also removed the laboratory-of-origin effect (Kruskall-Wallis  
 192 test,  $p = 0.22$ ; Supplemental Note S3). We could further recognize a number of attributes that could explain these  
 193 divergent deletion profiles. First, the 21 divergent genomes had on average shorter read length compared to the rest  
 194 (median = 57 vs. 69; Wilcoxon rank sum test  $p < 0.001$ ; Supplemental Fig. S5A). One of these was the Iceman,  
 195 with unusually short (50 bps) reads. Second, the coverage of the 21 divergent genomes was lower compared to the  
 196 remaining 50 (median = 3.31 vs. 3.98; Wilcoxon rank sum test,  $p = 0.014$ ; Supplemental Fig. S5B). For instance,  
 197 all three genomes with  $<0.1\times$  coverage in our dataset (ne4, ko2, and DA379) were among the outliers. The number  
 198 of non-genotyped loci was likewise higher in the divergent group (median = 1509 vs. 1886; Wilcoxon rank sum test,  
 199  $p = 5.39 \times 10^{-5}$ ; Supplemental Fig. S5C). UDG-treatment did not appear to be related to outlier behaviour (binomial  
 200 test  $p = 2.633 \times 10^{-9}$ ; Supplemental Fig. S5D). Meanwhile, Bon002, the only sample produced using whole-genome  
 201 capture, was among the most extreme outliers, suggesting that the capture procedure distorts coverage. Consequently  
 202 we removed these 21 genomes from further analyses.

## 203 A comparison of deletion and SNP diversity across 50 ancient genomes

204 The above filtering steps resulted in a dataset of 8,780 derived deletions genotyped in at least one of the 50 ancient  
 205 Eurasian genomes, with 396-748 deletions (median = 467.5) detected in heterozygous or homozygous state per genome,  
 206 and 29% detected in at least one genome.

207 We used this dataset to test three hypotheses: (i) that CONGA-called deletion diversity patterns should parallel SNP  
 208 diversity patterns, reflecting shared demographic history (genetic drift and admixture) among genomes, (ii) that  
 209 CONGA-called deletions should be evolving under some degree of negative selection (caused by gene expression  
 210 alterations, exon loss, or frame-shifts), and (iii) that variation in deletion load among genomes may be correlated  
 211 with variation in deleterious SNP load. We note that the first two patterns (hypotheses i and ii) have been previously  
 212 described using large modern-day CNV datasets (see Conrad and Hurles (2007); Levy-Sakin *et al.* (2019); Almarri *et al.*  
 213 (2020) for drift, and Conrad *et al.* (2010); Cooper *et al.* (2011); Sudmant *et al.* (2015a) for selection), and our goal here  
 214 was mainly to perform a sanity check and assess CONGA's effectiveness in producing reliable biological signals.

215 To test the first hypothesis, we compared pairwise genetic distances among the 50 individuals (Figure 4A) calculated  
 216 using either SNPs or deletion genotypes. For this, we collected 38,945,054 autosomal SNPs ascertained in African  
 217 individuals in the 1000 Genomes Dataset and genotyped our 50 ancient genomes at these loci (Methods). We then  
 218 calculated pairwise outgroup- $f_3$  statistics, a measure of shared genetic drift between a pair of genomes relative to an  
 219 outgroup population Patterson *et al.* (2012). Using the Yoruba as outgroup, we calculated genetic distances for all  
 220 pairs of ancient genomes as  $(1 - f_3)$ , using either SNPs or deletions. We observed strong positive correlation between  
 221 the two resulting distance matrices (Spearman  $r = 0.671$ , Mantel test  $p = 0.001$ ) (Figure 4B). Summarizing SNP-  
 222 and deletion-based distances using multidimensional scaling (MDS) also revealed highly similar patterns, with clear  
 223 clustering among west and east Eurasian genomes observed with either type of variation (Figure 4C, D). This result was  
 224 encouraging in showing that diversity patterns based on deletion genotyping with CONGA in a heterogeneous sample  
 225 of low coverage ancient genomes reveals expected signals of shared demographic history.

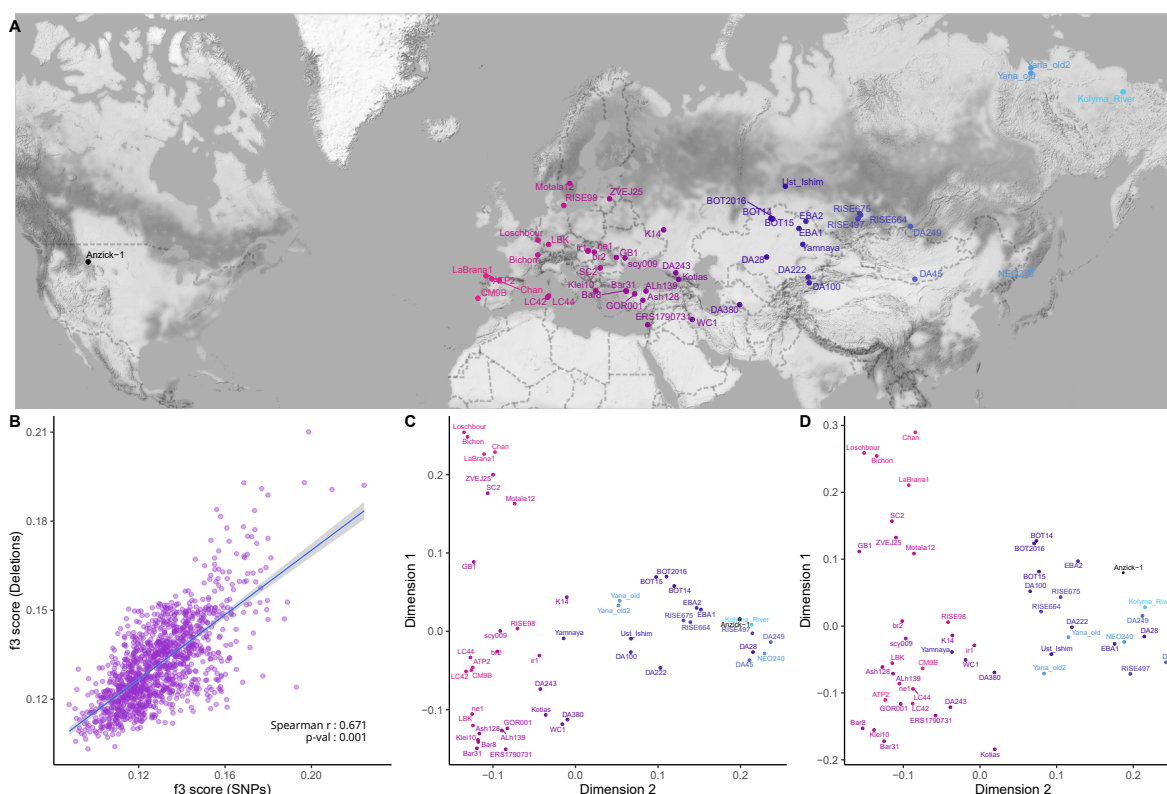

Figure 4: (A) Geographic locations of the 50 ancient individuals. (B) Comparison of genetic distances calculated using SNPs and deletions. We calculated the Spearman correlation coefficient between two matrices and then calculated Mantel test p-value using the "mantel" function in R package "vegan" (v2.5-7). (C) and (D) represent multidimensional scaling plots that summarize outgroup- $f_3$  statistics calculated across all pairs among the 56 ancient individuals using SNPs and deletions, respectively.

## 226 Negative selection on deletion variants

227 We next studied the impact of negative (purifying) selection on deletions by comparing the site-frequency-spectrum  
228 (SFS) of autosomal deletions with those of SNPs. We used the 8,780 human-derived deletions and 32,304,437 human-  
229 derived SNP alleles across the 50 ancient genomes (Methods). To allow comparison with the pseudo-haploidized SNP  
230 genotype data, we randomly chose one allele per genome (i.e., deletion or no event) in the deletion dataset. Set side  
231 by side with the SNP SFS, we observed an excess of singletons and a lack of fixed derived variants among deletions,  
232 consistent with stronger negative selection on the latter (Figure 5A). The excess of undetected and singleton deletions  
233 does not appear to be related to low recall, as both high and low coverage genomes show the same trend (Supplemental  
234 Fig. S6).

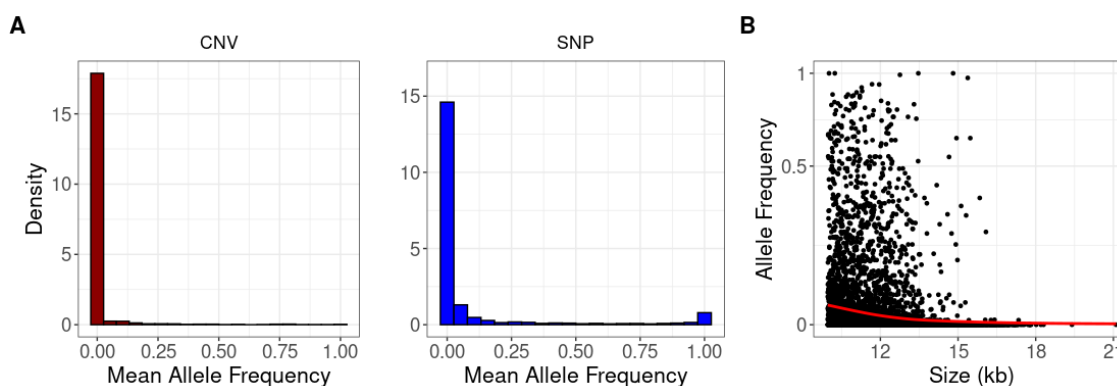

Figure 5: (A) The site-frequency-spectra of derived deletion alleles (on the left,  $n=3,472$ ) and derived SNP alleles (on the right,  $n=57,307$ ). The x-axes show mean allele frequency for each locus calculated using only those genomes where a locus has been observed (e.g. an allele observed in 10 out of 40 genomes will be represented as 25%). The two distributions are significantly different from each other (Kolmogorov-Smirnov test  $p < 10^{-15}$ ). (B) The size distribution (in kbps) of the deletions versus mean allele frequency. The red line shows the fitting of smoothing spline and indicates a negative correlation (Spearman correlation  $r = -0.33$ ,  $p < 10^{-16}$ ). Both axes were  $\log_2$ -scaled.

235 If deletions are under negative selection we may also expect longer deletions, or deletions containing evolutionary  
236 conserved genes, to be segregating at lower frequencies. Indeed, we found that deletion allele frequencies were  
237 negatively correlated with deletion size across the 50 genomes (Spearman correlation  $r = -0.33$ ,  $p < 10^{-16}$ )  
238 (Figure 5B). To test the second idea, we determined deletions overlapping Ensembl human genes. Overall, 26% of  
239 the 8,780 derived deletions overlapped minimum one gene. We then collected mouse-human dN/dS ratios, an inverse  
240 measure of protein sequence conservation (Methods). We found that deletions with lower (below-mean) allele frequency  
241 had slightly lower dN/dS values compared to deletions with higher (above-mean) allele frequency (median = 0.086 vs.  
242 0.097; Mann-Whitney U test, one-sided  $p = 0.055$ ). These observations, along with the SFS comparison, follow the  
243 notion that deletions are evolving under negative selection.

244 We further asked whether inter-individual variation in the total deletion mutation burden that we measure in our  
245 dataset may be correlated with variation in the burden of functional deleterious SNPs based on their impact on protein  
246 sequence. Demographic bottlenecks can theoretically cause variable levels of mutation burden –as deletions and/or as  
247 SNPs– among ancient genomes, and these burden levels could be correlated especially if their phenotypic impacts are  
248 comparable (see Discussion). To test this we collected (a) total deletion length and (b) the number of genes affected by  
249 deletions, for each of the 50 ancient genomes (Supplemental Fig. S7). We further collected SIFT scores (an estimate of  
250 how protein sequence would be affected by a SNP Ng and Henikoff (2003)) for  $n=22,996$  SNPs in our dataset, predicted  
251 to be "deleterious" or "tolerated", and used these to calculate a deleterious/tolerated ratio per genome (Methods;  
252 Supplemental Fig. S8A). We then compared the deleterious/tolerated ratio-based burden levels with deletion-based  
253 mutation burden levels (total length and number of genes), but found no significant correlation (Spearman  $r = 0.09$  and  
254  $r = -0.05$ , respectively,  $p > 0.5$ ; Supplemental Fig. S8B). This could be explained by high noise and lack of statistical  
255 power, as well as differences in phenotypic impacts between deletions and SNPs (see Discussion). We also did not  
256 observe any correlation between historical age and deletion frequencies in this sample (Supplemental Fig. S9).



## 257 Time and memory consumption

258 Finally, we examined time and memory requirements of CONGA. We first tested our performance of deletions with  
259 BAM files of the 71 ancient genomes presented above. This finished in  $\sim 12$  hours in total with as low as 2.2 GB of  
260 peak-memory consumption. This is  $\sim 10$  minutes per genome. In order to evaluate CONGA's performance with a  
261 higher coverage genome sample, we ran 30 genomes (randomly selected 10 CEU, 10 YRI, 10 TSI) from the 1000  
262 Genomes Project Phase 3, which had mean  $7.4\times$  coverage Sudmant *et al.* (2015b). The analysis took just slightly  
263 longer,  $\sim 15$  minutes average per genome, with similar memory usage.

264 We also compared the time and memory requirements of CONGA, GenomeSTRiP, FREEC and CNVnator in Table 2.  
265 In order to benchmark these tools, we used a  $5\times$  simulated genome (the same genome with medium sized CNVs used  
266 in the simulation experiments described above) with the same computing resources<sup>1</sup>. CONGA has the lowest runtime  
267 and memory footprint among the other tools.

268 In Supplemental Table S1.D we report the effects of parameter choices when using with CONGA on runtime and  
269 memory usage. We note that using split-reads for duplication genotyping (intended for higher coverage genomes)  
270 increases runtime and memory consumption significantly because here CONGA uses its own small-scale read mapper,  
271 which creates a bottleneck.

272 We further provide a comparison of CONGA's performance on genomes of various depths of coverage in Supplemental  
273 Table S1.D, calculated using the down-sampled  $23\times$  Yamnaya genome (with coverages between  $23\times$  and  $0.07\times$ ).

Table 2: Time and Memory Consumption

| Tools       | Time (h:m) | Peak Memory Usage (GB) |
|-------------|------------|------------------------|
| CONGA       | 0:09       | 1.2                    |
| GenomeSTRiP | 1:22       | 2.2                    |
| FREEC       | 0:39       | 7.1                    |
| CNVnator    | 0:32       | 14.1                   |

Time and memory consumption of each algorithm for a simulated genome of  $5\times$  depth of coverage with 1680 deletions and 1684 duplications. "Time" refers to wall clock time and "Peak memory usage" is the maximum resident set size. Note that GenomeSTRiP has two steps in its pipeline: preprocessing and genotyping. Here, time was calculated by summing the running times of each step, and memory by taking the maximum. For CONGA, we used default parameters used in the simulation experiments.

## 274 Discussion

275 Modern human genome sequencing experiments today typically reach coverages  $>20\times$  and increasingly use long read  
276 technology, and such experiments can employ diverse read signatures to reliably identify CNVs Alkan *et al.* (2011).  
277 CONGA's approach that mainly relies on the read-depth signature is naive in comparison; however, using read-depth  
278 appears as the main practical solution given the short fragment size and the predominance of low coverage (around or  
279  $<1\times$ ) among ancient genome datasets.

### 280 CONGA's overall performance and utility

281 Despite these challenges, our experiments using simulated genomes and down-sampled real ancient FASTQ data showed  
282 that CONGA can relatively efficiently genotype deletions and duplications of size  $>1$  kbps at  $1\times$  coverage, or even  
283 lower. CONGA outperformed two "modern DNA" CNV discovery algorithms, FREEC and CNVnator, two methods  
284 previously employed in ancient genome analyses Smith *et al.* (2017); Bhattacharya *et al.* (2018). CONGA exceeded both  
285 tools in TPR and true negative rates, especially at coverages  $<1\times$ . This is unsurprising, as these tools were developed  
286 for discovering novel CNVs in relatively high coverage genome data. Meanwhile, compared to GenomeSTRiP, a CNV  
287 genotyper that also uses both different sources of information within a Bayesian framework Handsaker *et al.* (2011,  
288 2015), CONGA performed better in achieving lower FDR rates at all coverages, while GenomeSTRiP had higher recall  
289 at coverages  $0.5\times$  or below. In time and memory use, CONGA surpassed all three tools.

290 In terms of deletion copy number estimates, CONGA again achieved acceptable accuracy ( $\sim 75\%$  TPR and  $<30\%$   
291 FDR) in genomes of  $0.5\times$  coverage. At lower depths of coverage and also when genotyping deletions  $<1$  kbps, recall  
292 and/or precision were weaker. CONGA's performance on duplications was also poor, as we discuss below.

<sup>1</sup>Intel(R) Xeon(R) CPU E5-2640 v2 @ 2.00GHz: 2CPUs \* 8 cores each=16 cores total and 216GB RAM

293 Overall, the relatively high accuracy at  $\geq 0.5\times$  coverage suggests that CONGA could be used to genotype deletions  
294 across a considerable fraction of published shotgun sequenced ancient genomes. CONGA and GenomeSTRiP could  
295 also be used in parallel, as they appear to complement each other in recall and specificity. Further, GenomeSTRiP  
296 can be used in population samples for jointly genotyping low coverage genomes, which could potentially increase  
297 performance. We caution, however, that joint genotyping can create ascertainment biases if coverage and ancestry  
298 co-vary among jointly analysed genomes.

299 Beyond aDNA, CONGA is suitable for CNV analyses for any low depth whole-genome sequencing (WGS) experiment.  
300 Such studies are increasing in number due to the trade-off between budget limitations and the wealth of genome-wide  
301 information that can be used in population and conservation genetics (e.g. Vieira *et al.* (2016)).

### 302 **Caveats in duplication genotyping**

303 In simulated genome experiments, CONGA's performance in genotyping duplications was similar to that in deletions.  
304 Beyond read-depth information (also used in genotyping deletions), duplication genotyping could also effectively benefit  
305 from paired-end information from split reads. Using paired-end information alone yielded  $>0.65$  F-Score for duplication  
306 genotyping, though only at  $5\times$  coverage and with variants  $>10$  kbps (Supplemental Table S1.E; Supplemental Fig.  
307 S10). In down-sampling experiments, CONGA showed slightly lower performance in duplication genotyping than in  
308 deletion genotyping when using two ancient genomes available as FASTQ files. However, CONGA's performance was  
309 dramatically low on the  $23\times$  ancient BAM file, Yamnaya. This can be explained as follows (see Supplemental Note  
310 S2): (i) The available Yamnaya data was processed in such a way that excess reads at duplicated loci, i.e. read-depth  
311 information, was lost. (ii) Consequently, nearly all (97%) duplications CONGA genotyped in the original ( $23\times$ )  
312 BAM file were called only using paired-end information. (iii) Because paired-end information is rapidly lost with  
313 decreasing coverage (as it requires reads overlapping breakpoints), and read-depth information was lacking, genotyping  
314 duplications in this BAM files became infeasible at  $<5\times$  coverage.

315 The majority of shotgun ancient genomes in public databases are only published as BAM files. The majority of published  
316 files are also at  $<5\times$  coverage. Hence, most published ancient shotgun genomes are not amenable to duplication  
317 genotyping with CONGA. This is highly unfortunate, as gene duplications are a major source of evolutionary adaptation  
318 that would be valuable to study also in ancient populations.

### 319 **Caveats in deletion genotyping**

320 Applying CONGA to genotype deletions on a heterogeneous set of real ancient shotgun genomes revealed conspicuous  
321 technical influences on deletion genotyping, with a significant fraction of the 71 analysed genomes displaying outlier  
322 behaviour in their deletion frequencies. We could notice technical particularities for the 21 genomes identified as  
323 outliers, such as lower coverage, shorter read lengths, or the application of whole-genome hybridization capture. Our  
324 results suggest that  $0.4\times$  coverage may be close to the lower threshold for deletion genotyping of  $>1$  kbps events,  
325 slightly higher than the threshold in our simulation results. We also find that whole-genome hybridization capture and  
326 extra short reads (roughly  $\leq 55$  bp) compromise deletion genotyping, while UDG-treatment does not show a significant  
327 effect. That said, we lack clear explanations for outlier deletion frequency patterns for some of these 21 genomes. For  
328 instance, the genome SI-45 has coverage  $>3\times$  and an average read length of 60 bps, but nevertheless displays unusual  
329 deletion patterns. We suspect that such unexpected patterns might reflect technical peculiarities in library preparation,  
330 sequencing or data filtering. Unique taphonomic processes influencing DNA preservation and variability in coverage  
331 may also be at play.

332 Such effects could be investigated by future studies compiling larger datasets with detailed experimental descriptions.  
333 Meanwhile, our results point to the necessity of rigorous quality control and outlier filtering when calling deletions in  
334 heterogeneous datasets, similar to practices traditionally adopted in transcriptome analyses. This is particularly essential  
335 when combining genomes produced using different experimental protocols and sequencing platforms.

### 336 **Community recommendations for improving CNV analyses in ancient genomes**

337 The above observations mark the urgent need for new practices in producing and publishing ancient genomes to allow  
338 reliable study of both deletions and duplications, beyond SNPs.

- 339 • Most published ancient genome data to date is SNP capture data, which is largely worthless for CNV analyses.  
340 Our results underscore the long-term value of shotgun sequencing data over SNP capture, as well as whole-  
341 genome capture.
- 342 • Publishing data as raw FASTQ files should be priority. The main motivation behind publishing BAM files  
343 instead of raw data is to avoid publishing environmental DNA reads, which constitute a large fraction of

344 reads from shotgun sequenced aDNA experiments. Saving microbial (e.g. pathogenic) aDNA fractions  
345 for investigations is another motivation. Nevertheless, our results show that raw FASTQ data is absolutely  
346 necessary for duplication genotyping at low coverage and also helpful against biases in deletion genotyping.  
347 In the long term, publishing raw data will be for the whole community's benefit.

- 348 • Sharing all details on DNA extraction, library construction, as well as the alignment and preprocessing steps  
349 used in creating the exact version of datasets submitted to public databases is crucial for healthy reuse of the  
350 data.

### 351 **Purifying selection and mutation loads in past populations**

352 Our analysis of >1 kbps deletions genotyped in 50 ancient genomes revealed how variation in deletion frequencies  
353 reflect (a) demographic history, as reflected in strong correlation with SNP variation and spatial clustering, and (b)  
354 negative selection, as reflected in a steeper SFS than of SNPs, lower frequencies of large deletions, and lower frequencies  
355 of deletions overlapping conserved genes. These results show that CONGA can identify reliable biological signals in  
356 technically heterogeneous and noisy datasets, which is a non-trivial outcome.

357 Beyond expected patterns, we also studied possible correlation between deletion loads and deleterious SNP loads  
358 per genome across the 50 ancient individuals. High deleterious mutation loads could arise by relaxation of negative  
359 selection due to strong bottlenecks, as suggested for Wrangel Island mammoths Rogers and Slatkin (2017) or for  
360 dogs Marsden *et al.* (2016). Conversely, bottlenecks can cause high inbreeding levels, and this may lead the purging of  
361 recessive deleterious variants, as recently described for a founder population of killer whales Foote *et al.* (2021). In  
362 our dataset we found no significant relationship between deletion-related loads and deleterious SNP loads. This could  
363 be due to lack of strong variability among Eurasian genomes in deleterious mutation burdens or due to low statistical  
364 power, as we only use deletions segregating in Africa. The result could also reflect differences in dominance effects or  
365 fitness effects between SNPs and deletions.

366 A full analysis of this question could be possible with the creation of a geographically comprehensive genomic time-  
367 series, especially genomes of non-Eurasian populations with variable demographic histories. It would further require  
368 CNV discovery in carefully processed high-coverage ancient genomes and subsequent genotyping on low coverage  
369 data using CONGA. We hope that our study opens the way for such work, bringing deeper insight into the impacts of  
370 selection and drift in humans and other species.

## 371 **Methods**

372 Among various approaches developed for CNV discovery using high throughput sequencing data, almost all use the  
373 fact that read-depth, i.e., the density of reads mapped to the reference genome, will be on average lower in deleted  
374 regions and higher in duplicated regions Alkan *et al.* (2011); Ho *et al.* (2020). The distance between paired-end reads,  
375 their orientation, and split-read information (start and end of reads mapping to different locations) are further sources  
376 of information used in determining CNVs. Although available CNV discovery algorithms generally perform well in  
377 modern-day human genome sequencing data with high coverage, this is not necessarily the case for ancient genomes, as  
378 well as other low coverage sequencing experiments (Supplemental Fig. S11, S12). The first reason is that the majority  
379 of shotgun ancient genomes are produced at low coverage (typically  $<1\times$ ), which constrains the use of read-depth  
380 information. Second, ancient DNA fragments are short and of variable size (typically between 50-100 bps) Shapiro and  
381 Hofreiter (2014). Thus, paired-end information is absent, and available split-read information is also limited. Variability  
382 in ancient DNA preservation and genome coverage Pedersen *et al.* (2014) is yet another noise source that is expected to  
383 limit efficient CNV discovery. CONGA overcomes these limitations using genotyping instead of *de novo* discovery.  
384 It estimates whether a candidate CNV, the location of which is provided as input, is present in a genome in BAM  
385 format. It also estimates the genotype, i.e., the heterozygous or homozygous state. CONGA makes use of read-depth  
386 information for deletions, and both read-depth and split-read information for duplications.

### 387 **Likelihood-based read-depth calculation for deletion and duplication genotyping**

388 The input to the algorithm is (1) a list of candidate CNV locations and CNV type, i.e., deletion or duplication, and (2) a  
389 data set of reads aligned to the linear reference genome, e.g., using BWA Li and Durbin (2009), which should be in  
390 BAM format.

391 In order to calculate the likelihood of a CNV at a given locus based on read-depth information, CONGA uses an  
392 approach akin to Soylev *et al.* (2019). Let  $(S_i)$  be the  $i^{th}$  CNV in our CNV input list, defined by the breakpoint interval  
393  $(B_l, B_r)$  and the type of CNV: a deletion or duplication. At this locus, CONGA calculates the likelihood of the three  
394 possible genotype states,  $k$ , given the read alignment data and CNV type. The genotype states are: no event ( $k = 0$ ), a

395 heterozygous state ( $k = 1$ ), or a homozygous state ( $k = 2$ ). The likelihood, in turn, is calculated by comparing the  
396 observed ( $O_i$ ) read-depth versus the expected ( $E_{ik}$ ) read-depth within  $(B_l, B_r)$ , given the three different genotypes.  
397 We detail the steps below.

- 398 1. We count the total number of mapped reads within that locus (falling fully within the interval  $(B_l, B_r)$ ). This  
399 is the observed read-depth,  $(O_{RD})$ .
- 400 2. We calculate expected read-depth under a "no event" scenario, i.e., representing the diploid state. Here we  
401 account for the GC bias in high-throughput sequencing data Smith *et al.* (2008), by using LOESS smoothing to  
402 normalize read-depth for GC content. Specifically, for each chromosome, we calculate the read-depth values  
403 per GC percentile for sliding windows of size 1,000 bps (step size = 1 bp). We then calculate the average  
404 read-depth per GC percentile. Then, using the chromosome-wide average GC value for the interval  $(B_l, B_r)$ ,  
405 we calculate the expected diploid read-depth,  $E_{i_{k=0}}$ .
- 406 3. We model the read-depth distribution as Poisson, using the expected read-depth values for  $k = 0$ ,  $k = 1$ ,  
407  $k = 2$ . We calculate the probability  $P(RD_{S_i} | state = k)$  as:

$$P(RD_{S_i} | state = k) = \frac{E_{ik}^{O_i} \times e^{-E_{ik}}}{O_i!},$$

408 where  $E_{ik}$  is the expected read-depth given  $state = k$ , and  $O_i$  is the observed read-depth at that specific locus.  
409 A typical autosomal human locus is diploid (has copy number = 2); therefore when there is no CNV event  
410 ( $k = 0$ ), the expected value of  $O_i$  should be  $E_{i_{k=0}}$ .

411 If a genome is homozygous for a deletion, we expect no reads mapping to the region, thus  $O_i \sim E_{i_{k=2}} = 0$ . For  
412 heterozygous deletions, the expected number of mapped reads in that interval will be half of the expected diploid  
413 read-depth:  $O_i \sim E_{i_{k=1}} = E_{i_{k=0}}/2$ . For homozygous duplications, we expect  $O_i \sim E_{i_{k=2}} = E_{i_{k=0}} \times 2$ . For  
414 heterozygous duplications, we expect  $O_i \sim E_{i_{k=1}} = E_{i_{k=0}} \times 1.5$ .

- 415 4. We calculate a likelihood-based score, which we term the C-score, to estimate how likely locus  $S_i$  carries a  
416 non-reference variant in a genome, in either one copy or two copies. For this we use the calculated likelihoods  
417 for the three states. We define the C-score as the maximum of the likelihoods of  $(S_i)$  being present in  
418 heterozygous state ( $k = 1$ ) or in homozygous state ( $k = 2$ ) in that genome, over the likelihood of no event  
419 ( $k = 0$ ). We use the log function to avoid numerical errors.

$C - score(S_i) =$

$$\frac{\max(\log(P(RD_{S_i} | k=1)), \log(P(RD_{S_i} | k=2)))}{\log(P(RD_{S_i} | k=0))},$$

420 The C-score is distributed between 0 and  $+\infty$ , with lower scores indicating higher likelihood of a true CNV  
421 event.

422 Results from our simulations and down-sampling experiments suggest that the relatively simple Poisson distribution  
423 can be effectively used to model copy number states, especially in the face of potentially non-independent errors due to  
424 ambiguous mapping of short and damaged reads or GC content heterogeneity. We note that alternative models have  
425 also been used for analysing CNVs in short read sequencing data, such as the negative binomial distribution Miller *et al.*  
426 (2011) or Gaussian mixed models Handsaker *et al.* (2011). We also note CONGA's our approach could be expanded in  
427 the future by including the evaluation of duplication events involving  $>2$  copies, as in multicopy genes Sudmant *et al.*  
428 (2010).

### 429 Split-read and paired-end signatures for duplication genotyping

430 Beyond read-depth, information of paired-end reads or read fragments that do not linearly map to the genome can  
431 be used to identify CNVs. Ancient genomes are sometimes single-end and sometimes paired-end sequenced, but in  
432 the latter case, short overlapping reads are typically merged into a single read before alignment. Ancient genome  
433 data is thus practically single-read. However, the split-read method can be applied on single-read ancient genome  
434 data, which emulates paired-end information for genotyping duplications. This approach is visualized in Figure 6.  
435 We therefore designed CONGA to include both paired-end and single-end reads as input and to evaluate paired-end  
436 signature information.

437 First, assume a read of length  $L$  mapped to position  $pos_x$  in the reference genome, where  $pos_x$  is assumed to be one  
438 of the breakpoints of a putative CNV. There always exists a subsequence  $\geq L/2$  that will have at least one mapping  
439 in the reference genome with some error threshold. Thus, we can split a read into two subsequences, assigning the



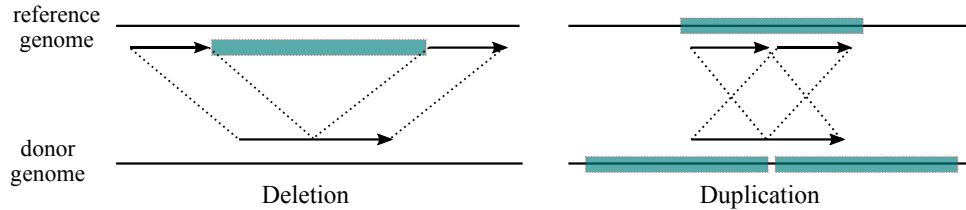

Figure 6: The figure shows our split-read approach to emulate paired-end using single-end reads. We use short-read Illumina mappings in a BAM file as input. We split each discordant read (whose mapping quality is larger than the given threshold and does not overlap with a known satellite) from the middle, keeping the initial mapping as one element and the other subsequence (split segment) as the second element of a pair. We remap the split segment to the reference genome, and evaluate the position and the orientation of both reads to identify the presence of putative CNVs.

440 actual mapping to one of the pairs and remapping the other subsequence ("split segment") as a second pair. There  
 441 are two possible split strategies: an even decomposition, where both subsequences are of equal lengths, or an uneven  
 442 decomposition, where the subsequences are of unequal lengths. Given the infeasibility of testing each split position and  
 443 the fact that ancient reads are typically already short, we follow Karakoc *et al.* (2012) and split the read from the middle  
 444 to obtain two reads with equal lengths  $L/2$ . If a read overlaps a duplication breakpoint, and assuming that the expected  
 445 position of the breakpoint will be uniformly distributed within the read, the split segment will map to the reference  
 446 genome with insert size—the distance between the split-read pairs—greater than zero.

447 With this simple observation, the need to observe all possible breakpoints can be eliminated. Thus, given a single-end  
 448 read  $Rse_i$ , we define  $Rpe_i = (l(Rpe_i[pos_x : pos_x + RL/2])$  and  $r(Rpe_i[pos_y : pos_y + RL/2])$ , where  $pos_x$  is the  
 449 initial mapping position of the single-end read,  $pos_y$  is the remapping position of the split read,  $RL$  is the length of the  
 450 single-end read observed before the split,  $l(Rpe_i[pos_x : pos_x + RL/2])$  is the left pair within  $pos_x$  and  $pos_x + RL/2$   
 451 and  $r(Rpe_i[pos_y : pos_y + RL/2])$  is the right pair within  $pos_y$  and  $pos_y + RL/2$  of the paired-end reads. We use this  
 452 information as described in the following section.

### 453 Remapping paired-reads and utilizing paired-read information

454 According to our remapping strategy, we use a seed-and-extend approach similar to that implemented in mrFAST Alkan  
 455 *et al.* (2009), where a read is allowed to be mapped to multiple positions. Our main concern here is that the split  
 456 segment, due to its short length, can be mapped to unrealistically high numbers of positions across the genome. To  
 457 overcome this problem we use the approach developed in TARDIS Soylev *et al.* (2017), allowing the split segment to  
 458 be mapped only up to 10 positions within close proximity (15 kbps by default) of the original mapping position and  
 459 applying a Hamming distance threshold for mismatches (5% of the read length by default).

460 Based on the distance between the reads (insert-size) and orientation, we then evaluate the type of putative CNV.  
 461 As Figure 6C shows, if the split segment maps behind the initially mapped segment of the same pair to generate a  
 462 reverse-forward mapping orientation, this would be an indication of a duplication.

463 In order to utilize this paired-read information, for each CNV locus used as input to our algorithm, we count the number  
 464 of read-pair (i.e. split segments) that map around  $\pm 5$  kbps of the breakpoints. Each such read-pair is treated as one  
 465 observation. We use these counts in combination with the C-score (read-depth information) to genotype duplications  
 466 (see below). We do not use this read-pair information for genotyping deletions due to its low effectiveness in our initial  
 467 trials (Supplemental Table S1.E).

### 468 Mappability filtering

469 The probability of unique alignment of a read of certain size varies across the genome, mainly due to repetitive  
 470 sequences. Various algorithms estimate this probability, termed mappability, across the genome for k-mers of specific  
 471 length Koehler *et al.* (2011); Derrien *et al.* (2012); Karimzadeh *et al.* (2018); Pockrandt *et al.* (2020). This is calculated  
 472 by extracting k-mers of given length through the genome, remapping them to the reference genome, and measuring  
 473 mappability as the proportion of unique mappings Karimzadeh *et al.* (2018). Because low mappability regions can  
 474 be confounded with real deletions, we use mappability information to filter out CNV loci that could represent false  
 475 positives.

476 CONGA accepts any mappability file in BED format, where values are distributed between 0 and 1. These can then be  
 477 used to filter out CNVs for minimum mappability.

478 In our experiments, we used the 100-mer mappability data from the ENCODE Project ENCODE Project Consortium  
479 (2012). Using this data, for each CNV event ( $S_i$ ), we calculated the average mappability value within its breakpoints.  
480 We used a minimum average mappability threshold of 0.9 for the CNV events we analyzed.

481 Our deletion frequency analysis results suggest that the strict filter should be used especially when analyzing data sets  
482 of heterogeneous origin. This is because published BAM files frequently differ in mapping quality filters applied before  
483 publishing (and these filters are usually not indicated), and such filtered BAM files will produce artificial deletion  
484 signals at low mappability regions, while unfiltered BAM files will not.

## 485 **Simulation and down-sampling experiments**

### 486 **Simulating ancient genomes with implanted deletions and duplications**

487 Our goal here was to study the performance of CONGA on different sized deletions or duplications using simulated  
488 genomes containing implanted CNVs and to determine thresholds for reliably calling these variants. We first employed  
489 VarSim Mu *et al.* (2015) to simulate and insert deletions and duplications into the human reference genome GRCh37.  
490 We repeated this three times, for small (100 bps - 1000 bps), medium (1000 bps - 10,000 bps), and large (10,000 bps -  
491 100,000 bps) CNVs. As a result we generated three CNV-implanted genomes, with around 1500 deletions and 1500  
492 duplications each (between 1385 and 1810). The CNVs were produced so that they were non-overlapping, and their  
493 length distribution and exact counts are provided in Supplemental Fig. S1.

494 To evaluate specificity and sensitivity, we also included a background (false) CNV set in the experiment, which would  
495 not be implanted but would be queried as part of the candidate list. This background set was prepared using recently  
496 published deletion and duplication calls from human genome sequencing experiments Audano *et al.* (2019); Chaisson  
497 *et al.* (2019); Zook *et al.* (2020); Collins *et al.* (2020) and also sequencing data from African populations (AFR) from  
498 Phase 3 of the 1000 Genomes Project Sudmant *et al.* (2015b). We compiled a list of 17,392 deletions and 14,888  
499 duplications that were non-overlapping and of size  $>\sim 1000$  bps using BEDTools mergeBed Quinlan and Hall (2010).  
500 When evaluating genomes with small CNVs (100 bps - 1,000 bps), we additionally included small CNVs from Chaisson  
501 *et al.* (2019). Specifically we added 4,623 deletions and 3,750 duplications of size 100 bps - 1,000 bps to the above  
502 background list.

503 In order to assess CONGA's performance, we added the true CNVs generated using VarSim to this background set (and  
504 removed overlapping CNVs from the candidate genotype set), such that only  $\sim 10\%$  of the input candidate CNV list  
505 were true events. Finally, we determined how many of these true events could be correctly called by CONGA and other  
506 software.

### 507 **Simulating ancient genome read data**

508 We used the above-described simulated genomes as input to Gargammel Renaud *et al.* (2017), which generates ancient-  
509 like Illumina reads, i.e., short reads of variable size bearing postmortem damage (i.e., C-to-T transitions at read ends)  
510 and including adapters. Gargammel can generate aDNA fragments following a size distribution given as input, and we  
511 used a subset of Fu *et al.* (2014), which is default for this software. We used Gargammel to produce reads at various  
512 depths of coverage:  $0.05\times$ ,  $0.1\times$ ,  $0.5\times$ ,  $1\times$  and  $5\times$ . We then removed adapters and merged overlapping reads Schubert  
513 *et al.* (2016) to generate single-end Illumina reads. These reads had sizes ranging between 34 bps and 139 bps, with  
514 average 69 bps and median 66 bps (these statistics were calculated using  $1\times$  coverage data, but other data also had  
515 similar distributions). We mapped the Gargammel-output reads back to the human reference genome (hg19, or GRCh37)  
516 using BWA-aln Li and Durbin (2009) with parameters "-l 16500 -n 0.01 -o 2" (Supplemental Material). Note that  
517 BWA-aln has been shown to be more accurate for short ancient reads than BWA-mem Oliva *et al.* (2021).

### 518 **Evaluation of CONGA, GenomeSTRiP, CNVnator and FREEC with simulated ancient genome data**

519 We ran CNVnator Abyzov *et al.* (2011), FREEC Boeva *et al.* (2012) and GenomeSTRiP Handsaker *et al.* (2011) on  
520 the simulated genomes with parameters described in the Supplementary Information and CONGA with two values for  
521 the C-score ( $<0.3$  and  $<0.5$ ). We used the above-described list of CNVs as the input candidate set for CONGA and  
522 GenomeSTRiP.

523 To determine true calls, we used  $>50\%$  reciprocal overlap for the two CNV events (the event in the input event set and  
524 the called event) to be considered the same. This calculation was done using BEDTools Quinlan and Hall (2010). The  
525 number of true CNVs were: 1810 deletions and 1751 duplications for 100 bps - 1000 bps; 1680 deletions and 1684  
526 duplications for 1000 bps - 10,000 bps; and 1385 deletions and 1532 duplications for 10,000 bps - 100,000 bps.

## 527 **Down-sampling experiment with real ancient genomes**

528 We used three relatively high coverage ( $\sim 23.3\times$ ,  $\sim 13.1\times$  and  $\sim 9.6\times$  respectively) genomes of a Yamnaya culture-  
529 related individual from early Bronze Age Karagash (hereafter Yamnaya), Kazakhstan de Barros Damgaard *et al.* (2018b),  
530 a Saqqaq culture-related individual from Bronze Age Greenland (hereafter Saqqaq) Rasmussen *et al.* (2010), and a  
531 4500-year old East African hunter-gatherer individual from Mota Cave in Ethiopia (hereafter Mota) Llorente *et al.*  
532 (2015). Using this data, and the above-described 17,392 deletions and 14,888 duplications of size  $>1$  kbps (see above)  
533 as input, we genotyped 2639 deletions and 1972 duplications in Yamnaya (deletion sizes: 1 kbps to 4 Mbps, median = 4  
534 kbps, mean = 23 kbps; duplication sizes: 1 kbps to 28 Mbps, median = 14 kbps, mean = 80 kbps); 1581 deletions and  
535 4097 duplications in Saqqaq (deletion sizes: 1 kbps to 5 Mbps, median = 5 kbps, mean = 17 kbps; duplication sizes: 1  
536 kbps to 28 Mbps, median = 16 kbps, mean = 70 kbps); and 688 deletions and 638 duplications in Mota (deletion sizes:  
537 1 kbps to 130 kbps, median = 4 kbps, mean = 7 kbps; duplication sizes: 1 kbps to 28 Mbps, median = 6 kbps, mean =  
538 82 kbps).

539 We then randomly down-sampled the BAM files to various depths using Picard Tools Pic (2019): between  $16-0.07\times$  for  
540 Yamnaya;  $9-0.05\times$  for Saqqaq;  $7-0.03\times$  for Mota. We note that this down-sampling procedure does not produce the  
541 exact targeted depths, which is the reason why we obtain variable coverages in Fig. 3.

542 For calling deletions we used  $C\text{-score} < 0.5$ . For calling duplications, we called events that fulfilled either of the  
543 following conditions (a)  $C\text{-score} < 0.5$ , or (b)  $C\text{-score} < 10$  and read-pair support  $> 10$ . Finally, treating the results of  
544 the original data as the correct call-set, we calculated TPR (true positive rate) and FDR (false discovery rate) for  
545 the down-sampled genomes. We considered CNVs with  $\geq 50\%$  reciprocal overlap as representing the same event,  
546 calculated using BEDTools Quinlan and Hall (2010).

## 547 **C-score and read-pair cutoffs and minimum CNV size**

548 We ran CONGA with a range of parameter values for the C-score [0.1-5] and for minimum read-pair support (from 0  
549 support to  $>30$ ), and using the above-described true event sets as the input candidate set involving medium and large  
550 CNVs (1680 deletions and 1684 duplications for 1000 bps - 10,000 bps, and 1385 deletions and 1532 duplications for  
551 10,000 bps - 100,000 bps).

552 We used simulation results (Supplemental Table S1.E) to choose an effective cutoff for calling CNVs. For both deletions  
553 and duplications, we decided to use  $C\text{-score} < 0.5$ , which appears to yield a good trade-off between recall and precision.  
554 Specifically, in simulations, this cutoff ensured an F-score of  $>0.5$  at  $0.1\times$  for  $>1$  kbps deletions, and superior F-scores  
555 at higher coverages (Supplemental Fig. S13).

556 In addition, we observed that read-pair support  $>10$  could be useful for identifying duplications in the absence of  
557 read-depth support, but only when coverages were  $\geq 1\times$  (Supplemental Table S1.E; Supplemental Fig. S10). Moreover,  
558 read-pair support was not valid for detecting deletions.

559 We note that CONGA outputs the C-scores and read-pair counts for all input CNVs. Users can choose alternative  
560 cutoffs to increase recall (higher C-scores) or precision (lower C-scores).

561 The simulation experiments showed that CONGA was not efficient in identifying events  $<1$  kbps. CONGA therefore  
562 ignores events  $<1$  kbps under default parameters. This can be modified by the user if needed.

## 563 **Analysis of real ancient genomes**

### 564 **Ancient genome selection and preprocessing**

565 We selected 71 ancient shotgun or whole-genome captured genomes from individuals excavated in West and East  
566 Eurasia and in North America (Supplemental Table S2). Our sample set belongs to a time range between c.2,800-45,000  
567 years Before Present (BP). Samples from 10 different laboratories were selected in order to study the effects of different  
568 data production protocols on deletion genotyping. We also chose genomes with a range of coverage levels ( $0.04\times$ - $26\times$ ,  
569 median =  $3.45\times$ ) and that included both UDG-treated and non-UDG-treated libraries. The only capture-produced data  
570 was Bon002 Kılınc *et al.* (2016), produced using whole-genome hybridization with myBaits (Arbor Biosciences, USA)  
571 probes.

572 Selected ancient genomes were mapped to the human reference genome (hg19, or GRCh37) using BWA aln/samse  
573 (0.7.15) Li and Durbin (2009) with parameters "-n 0.01, -o 2". PCR duplicates were removed using FilterUniqueSAM-  
574 Cons.py Kircher (2012).

575 We also removed reads with  $>10\%$  mismatches to the reference genome, those of size  $<35$  bps, and with  $<30$  mapping  
576 quality (MAPQ).

## 577 **Candidate CNV call set for real ancient genomes**

578 Here our goal was to study properties of deletion variants in ancient genomes and to compare these with SNP variation  
579 in terms of demographic history and purifying selection. Polymorphism data sets can suffer from ascertainment bias in  
580 downstream evolutionary analyses Clark *et al.* (2005). A common practice to avoid this bias is to use SNPs ascertained  
581 in a population that is an outgroup to the focal populations. We therefore used variants ascertained in modern-day  
582 African populations for both calling SNP and deletion variants in our ancient genomes.

583 In order to create a candidate deletion call set to be used as input to CONGA, we downloaded deletions of size >1000  
584 bps identified among 661 African population (AFR) genomes of the 1000 Genomes Project Phase 3 Sudmant *et al.*  
585 (2015b). When a deletion was located inside the breakpoints of another deletion, we removed the internal one. In  
586 addition, for pairs of deletions that had >50% overlap, we filtered out the smaller one. Finally, we filtered out deletion  
587 loci with <50% average mappability (see above). This resulted in 11,390 autosomal >1000 bps deletions from 661  
588 AFR genomes.

589 We filtered these deletions for high mappability ( $\geq 0.9$  average mappability) and being derived in the human lineage  
590 (see section "Ancestral state determination" below). This left us with 10,002 deletion loci.

## 591 **Deletion genotyping in ancient genomes**

592 We genotyped all the chosen 71 ancient genomes using the 11,390 AFR autosomal deletion data set (>1 kbps with  
593 mean 10,735 bps). We used C-score <0.5 as cutoff for calling deletions, and >2 for calling the reference homozygous  
594 genotype (0/0). To limit false negatives, C-scores between 0.5 and 2 were coded as missing (NA). Note that these  
595 cutoffs can be modified by the user.

596 In total, 1,222 deletion loci (12%) out of 10,002 were missing across all the 71 genomes. Of the remaining, 5,467 were  
597 genotyped as a deletion in heterozygous or homozygous state in at least one genome. Genotyping rates (non-missing  
598 values) in the full dataset was overall 80.0%.

## 599 **Analyzing the ancient deletion dataset**

600 We generated a heatmap summarizing deletion copy numbers using the R "gplots" package "heatmap.2" function Warnes  
601 *et al.* (2020). Further, we performed a principal components analyses (PCA) on the deletion copy number data set  
602 (removing missing values) with 71, 60 (first outlier filter) and 50 (refined data set) ancient genomes (Supplemental Fig.  
603 S4). PC1 and PC2 values were computed using the R "stats" package "prcomp" function using the default parameters R  
604 Core Team (2020). On the same 3 genome sets, we likewise created multidimensional scaling plots (MDS) calculated  
605 with parameter "k=2" with the R "cmdscale" function on a Euclidean distance matrix of deletion frequencies (without  
606 removing NAs), and hierarchical clustering trees summarizing Manhattan distance matrices, calculated with the R "dist"  
607 and "hclust" functions. This analysis revealed visible outliers in deletion frequency among samples, which we defined  
608 as the "divergent" genome set (Supplemental Fig. S3A; Supplemental Note S3).

609 Based on this observation, we compared the total number of missing values, average read length, and coverage between  
610 the divergent genome set (n=21) and the rest, which we refer to as the "coherent" set (n=50), using the Mann-Whitney  
611 U test with the R "wilcox.test" function, and visualized the data with R utility function "boxplot" R Core Team (2020)  
612 (Supplemental Fig. S5A, B, C, D). We likewise compared average deletion frequencies between UDG-treated and  
613 untreated genomes using the Mann-Whitney U test.

## 614 **Creating and analyzing the refined deletion data set and the SNP data set**

### 615 **SNP genotyping in ancient genomes**

616 Following the same reasoning as above regarding ascertainment bias, we used an African population to create a SNP  
617 genotyping set for calling SNPs in the ancient genomes. Specifically, we used the 1000 Genomes Yoruba data set,  
618 which included a total of 38,945,054 autosomal bi-allelic SNPs (minor allele frequency > 0) in 661 African genomes  
619 of the 1000 Genomes Project Phase 3 The 1000 Genomes Project Consortium (2015). First, all reads in all BAM  
620 files were clipped (trimmed) using the trimBam algorithm implemented in BamUtil Jun *et al.* (2015). Following  
621 standard practice Mitnik *et al.* (2018), we trimmed (a) the end 2 bases of each read for samples prepared with the  
622 Uracil-DNA-glycosylase (UDG) protocol, and (b) the end 10 bases of each read for non-UDG samples.

623 Using these BAM files of the 50 ancient individuals and the above-described SNP list, we generated pseudo-haploid  
624 SNP calls at these target SNP positions by randomly selecting one read and recording the allele carried on that read



625 as the genotype. This was performed using the pileupCaller software (<https://github.com/stschiff/sequenceTools>) on  
626 samtools mpileup output (base quality>30 and MAPQ>30) Li *et al.* (2009).

### 627 Ancestral state determination

628 To polarize deletion and SNP alleles for being ancestral or derived in the human lineage, we mapped loci from hg19  
629 (GRCh37) to panTro6 (chimpanzee) and to panPan2 (bonobo) using the UCSC Genome Browser tool "liftOver" with  
630 default parameters Kent *et al.* (2002). For deletions, we filtered out deletions that did not fully map to either chimpanzee  
631 or bonobo reference genomes, as these could represent derived insertions in the human lineage. The remaining deletions  
632 could thus be inferred to be alleles that were derived in humans. For SNPs, we removed the positions not represent  
633 in either chimpanzee or bonobo reference genomes and assigned the ancestral state as the Pan allele, only if both  
634 chimpanzee and bonobo carried same allele. This left us with 32,344,446 SNP positions with derived allele information.

### 635 Creating the refined deletion data set

636 We removed 21 genomes identified as outliers in both heatmap, PCA and MDS analyses. Next, we genotyped the  
637 8,780 AFR deletions in the remaining 50 genomes. We call this the "refined data set". After refining our data set,  
638 we also checked its general properties. We plotted size distribution in logarithmic scale, deletion allele frequency  
639 distribution and relative frequency distribution among observed heterozygous deletions over homozygous deletions  
640 using R's "graphics" package hist function (Supplemental Fig. S14) R Core Team (2020). We also plotted relative  
641 deletion (homozygous or heterozygous) frequencies of 8,780 deletions for each individual in our refined data set using  
642 R's "graphics" package matplot function R Core Team (2020).

### 643 Genetic distance and selection analyses using deletions and SNPs

644 Here our goal was to calculate pairwise genetic distances among the 50 ancient genomes using deletion allele frequencies  
645 and using SNPs, and further to compare the distances. We calculated distances using the commonly used outgroup- $f_3$   
646 statistics, which measures shared genetic drift between two samples relative to an outgroup, and is implemented as  
647 qp3pop in Admixtools v.7.0 Patterson *et al.* (2012). The outgroup- $f_3$  values were calculated for each pair of 50  
648 individuals (a) in the deletion and (b) in the SNP data sets, using the African Yoruba as outgroup in both cases. To  
649 convert the deletion data set to eigenstrat format, which Admixtools requires, we encoded the first nucleotide of each  
650 deletion as the reference allele, and the alternative allele was randomly assigned among the remaining 3 nucleotides  
651 using custom Python script. We thus calculated a pairwise similarity matrix for both data sets. Genetic distances  
652 were calculated as  $1-f_3$ . Distances were then summarized using multidimensional scaling (MDS) with the "cmdscale"  
653 function of R R Core Team (2020) (Figure 4C, D; Supplemental Fig. S4).

654 We further performed the Mantel test to compare the  $f_3$ -based similarity matrices calculated using SNPs and deletions.  
655 We used the "mantel" function in the R-package "vegan" with parameter "method=spearman" Oksanen *et al.* (2013).

### 656 Site frequency spectrum calculation for deletions and SNPs

657 Here our goal was to compare the SFS across deletions and SNPs called in ancient genomes. Because the ancient SNP  
658 genotypes are pseudo-haploidized, we performed the same pseudo-haploidization process on the deletion data set. For  
659 this, for any heterozygous call in the deletion data set, we randomly assigned either of the homozygous states, using the  
660 R "sample" function (i.e., we converted 1's to 0's or 2's with 50% probability). We then counted derived alleles at each  
661 locus, for deletions and for SNPs, and divided by the total number of genomes where an allele was observed at that  
662 locus (i.e., removing the missing data). We plotted the site-frequency spectrum analysis on both deletions and SNPs  
663 using R's "ggplot2" package geom\_histogram function Wickham (2016). We also calculated the Spearman correlation  
664 between the deletion size in logarithmic scale and the frequency using R's "stats" package "cor.test" function R Core  
665 Team (2020). Further, we plotted the site-frequency spectrum analysis on deletions in high and low coverage genomes  
666 using R's "ggplot2" package geom\_histogram function Wickham (2016) (Supplemental Fig. S6). The threshold is  
667 considered to be the median coverage ( $3.98\times$ ).

### 668 Evolutionary conservation

669 To measure evolutionary conservation for genes that overlapped deletions, we retrieved non-synonymous (dN) and  
670 synonymous (dS) substitution rate estimates between human (GRCh37) and the mouse genome (GRCm38) per gene  
671 from Ensembl (v75) via the R package "biomaRt" Durinck *et al.* (2005). We queried 18,112 genes with dN, dS values  
672 and calculated the dN/dS ratio (or Ka/Ks) per gene. The ratio for genes with more than one dN or dS values were  
673 calculated as the mean dN or dS per gene. We then intersected our deletions with the genes with dN/dS values using

674 BEDTools Quinlan and Hall (2010) and found 2,221 Ensembl (v75) human genes. Overall, 34% of the 10,002 derived  
675 deletions overlapped with at least one gene. We then collected mouse-human dN/dS ratios (Methods) for these genes ( $n$   
676 = 2,221, 0-1.18, median = 0.09, mean = 0.13). For deletions overlapping with multiple genes, we calculated the mean  
677 dN/dS per deletion. We then divided the deletions in our data set into two groups by the deletion allele frequency: high  
678 versus low relative to the median. We plotted the dN/dS ratios of the deletion groups defined above using the R package  
679 "ggplot2" and the "geom\_boxplot" function Wickham (2016).

## 680 **Comparison with SIFT predictions and temporal change**

681 Here our goal was to study deleterious mutation loads per genome in the form of SIFT-predicted harmful SNPs and  
682 CONGA-predicted deletions, across the 50 ancient genomes. We used SIFT predictions available in Ensembl (v75)  
683 collected via the R package "biomaRt" Durinck *et al.* (2005, 2009). We retrieved SIFT predictions of "tolerated" and  
684 "deleterious" impact and SIFT scores for all 1000 Genomes human SNPs from Ensembl, and subsetted the African  
685 SNP set used for genotyping the ancient genomes. This resulted in 22,996 SNPs with SIFT predictions. Further, we  
686 calculated a ratio representing the total number of SIFT-predicted "deleterious" SNPs over the number of "tolerated"  
687 SNPs, for each of the 50 individuals. In addition, we calculated the total CONGA-predicted deletion length and the  
688 total number of genes overlapping CONGA-predicted deletions per individual, ignoring homozygous or heterozygous  
689 state. We plotted these three mutation load scores, i.e. SIFT-predicted deleterious/tolerated ratios per individual, the  
690 number of affected genes, and the total deletion length, using R base function "plot" (Supplemental Fig. S7) R Core  
691 Team (2020). We further estimated pairwise correlations between the three scores, fitting the values into a linear model  
692 using the R "lm" function and calculating Spearman's rank correlation. We plotted the linear models using the R base  
693 function "pairs" (Supplemental Fig. S8B) R Core Team (2020).

694 We finally tested whether the mean deletion allele frequency changed over time by fitting the values in a linear model  
695 using the R "lm" function (Supplemental Fig. S9).

## 696 **Software Availability**

697 CONGA is implemented in C programming language and its source code is available under BSD 3-clause license  
698 at <https://github.com/asylvz/CONGA>, as well as Supplemental Code. Simulated datasets and predictions of each  
699 tool can be accessed through Zenodo (10.5281/zenodo.5555990). Mappability data was downloaded from [http://](http://hgdownload.cse.ucsc.edu/goldenpath/hg19/encodeDCC/wgEncodeMapability/)  
700 [hgdownload.cse.ucsc.edu/goldenpath/hg19/encodeDCC/wgEncodeMapability/](http://hgdownload.cse.ucsc.edu/goldenpath/hg19/encodeDCC/wgEncodeMapability/)

## 701 **Competing interest statement**

702 The authors declare no competing interests.

## 703 **Acknowledgements**

704 The authors would like to thank Gözde Zeliha Turan for her suggestions with mappability data and Kivılcım Başak  
705 Vural for technical support. This work was supported by the ERC Consolidator grant "NEOGENE" (Project No.:  
706 772390).

## 707 **Author Contributions**

708 AS developed and implemented the algorithm, performed simulations and down-sampling experiments. SSÇ and DK  
709 conducted technical and evolutionary analyses on real data. CA contributed to algorithm design. MS led the project and  
710 coordinated the activities. All authors contributed to editing the manuscript and participated in weekly discussions.

## 711 **References**

- 712 (2019). Picard toolkit. <https://broadinstitute.github.io/picard/>.
- 713 Abyzov, A. *et al.* (2011). CNVnator: an approach to discover, genotype, and characterize typical and atypical CNVs  
714 from family and population genome sequencing. *Genome Res*, **21**(6), 974–984.
- 715 Alkan, C. (2020). Automatic characterization of copy number polymorphism using high throughput sequencing. *Turkish*  
716 *Journal of Electrical Engineering & Computer Sciences*, **28**(1), 253–261.

- 717 Alkan, C. *et al.* (2009). Personalized copy number and segmental duplication maps using next-generation sequencing.  
718 *Nat Genet*, **41**(10), 1061–1067.
- 719 Alkan, C. *et al.* (2011). Genome structural variation discovery and genotyping. *Nat Rev Genet*, **12**(5), 363–376.
- 720 Allentoft, M. E. *et al.* (2015). Population genomics of bronze age eurasia. *Nature*, **522**(7555), 167.
- 721 Almarri, M. A. *et al.* (2020). Population structure, stratification, and introgression of human structural variation. *Cell*,  
722 **182**(1), 189–199.
- 723 Antonio, M. L. *et al.* (2019). Ancient rome: A genetic crossroads of europe and the mediterranean. *Science*, **366**(6466),  
724 708–714.
- 725 Audano, P. A. *et al.* (2019). Characterizing the major structural variant alleles of the human genome. *Cell*, **176**(3),  
726 663–675.
- 727 Bergström, A. *et al.* (2020). Origins and genetic legacy of prehistoric dogs. *Science*, **370**(6516), 557–564.
- 728 Bhattacharya, S. *et al.* (2018). Whole-genome sequencing of atacama skeleton shows novel mutations linked with  
729 dysplasia. *Genome research*, **28**(4), 423–431.
- 730 Boeva, V. *et al.* (2012). Control-FREEC: a tool for assessing copy number and allelic content using next-generation  
731 sequencing data. *Bioinformatics (Oxford, England)*, **28**, 423–425.
- 732 Broushaki, F. *et al.* (2016). Early neolithic genomes from the eastern fertile crescent. *Science*, **353**(6298), 499–503.
- 733 Chaisson, M. J. P. *et al.* (2015). Resolving the complexity of the human genome using single-molecule sequencing.  
734 *Nature*, **517**, 608–611.
- 735 Chaisson, M. J. P. *et al.* (2019). Multi-platform discovery of haplotype-resolved structural variation in human genomes.  
736 *Nature Communications*, **10**, 1784.
- 737 Chan, Y. F. *et al.* (2010). Adaptive evolution of pelvic reduction in sticklebacks by recurrent deletion of a *pitx1* enhancer.  
738 *science*, **327**(5963), 302–305.
- 739 Chen, X. *et al.* (2016). Manta: rapid detection of structural variants and indels for germline and cancer sequencing  
740 applications. *Bioinformatics*, **32**, 1220–1222.
- 741 Chiang, D. Y. *et al.* (2009). High-resolution mapping of copy-number alterations with massively parallel sequencing.  
742 *Nat Methods*, **6**(1), 99–103.
- 743 Clark, A. G. *et al.* (2005). Ascertainment bias in studies of human genome-wide polymorphism. *Genome research*,  
744 **15**(11), 1496–1502.
- 745 Collins, R. L. *et al.* (2020). A structural variation reference for medical and population genetics. *Nature*, **581**(7809),  
746 444–451.
- 747 Conrad, D. F. and Hurles, M. E. (2007). The population genetics of structural variation. *Nature genetics*, **39**(7),  
748 S30–S36.
- 749 Conrad, D. F. *et al.* (2010). Origins and functional impact of copy number variation in the human genome. *Nature*,  
750 **464**(7289), 704–712.
- 751 Cooper, G. M. *et al.* (2011). A copy number variation morbidity map of developmental delay. *Nature genetics*, **43**(9),  
752 838–846.
- 753 de Barros Damgaard, P. *et al.* (2018a). 137 ancient human genomes from across the eurasian steppes. *Nature*, **557**(7705),  
754 369–374.
- 755 de Barros Damgaard, P. *et al.* (2018b). The first horse herders and the impact of early bronze age steppe expansions  
756 into asia. *Science*, **360**(6396), eaar7711.
- 757 Derrien, T. *et al.* (2012). Fast computation and applications of genome mappability. *PloS one*, **7**(1), e30377.
- 758 Durinck, S. *et al.* (2005). Biomart and bioconductor: a powerful link between biological databases and microarray data  
759 analysis. *Bioinformatics*, **21**(16), 3439–3440.

- 760 Durinck, S. *et al.* (2009). Mapping identifiers for the integration of genomic datasets with the r/bioconductor package  
761 biomart. *Nature protocols*, **4**(8), 1184–1191.
- 762 Eisfeldt, J. *et al.* (2017). TIDDIT, an efficient and comprehensive structural variant caller for massive parallel sequencing  
763 data. *F1000Research*, **6**, 664.
- 764 ENCODE Project Consortium (2012). An integrated encyclopedia of DNA elements in the human genome. *Nature*,  
765 **489**, 57–74.
- 766 Foote, A. D. *et al.* (2021). Evidence of long-term purging of mutation load in killer whale genomes. *Biorxiv*.
- 767 Frantz, L. A. *et al.* (2020). Animal domestication in the era of ancient genomics. *Nature Reviews Genetics*, pages 1–12.
- 768 Fu, Q. *et al.* (2014). Genome sequence of a 45,000-year-old modern human from western siberia. *Nature*, **514**(7523),  
769 445–449.
- 770 Gamba, C. *et al.* (2014). Genome flux and stasis in a five millennium transect of european prehistory. *Nature*  
771 *communications*, **5**(1), 1–9.
- 772 Girirajan, S. *et al.* (2011). Human copy number variation and complex genetic disease. *Annual review of genetics*, **45**,  
773 203–226.
- 774 Gonzalez, E. *et al.* (2005). The influence of CCL3L1 gene-containing segmental duplications on HIV-1/AIDS  
775 susceptibility. *Science*, **307**(5714), 1434–1440.
- 776 González-Fortes, G. *et al.* (2017). Paleogenomic evidence for multi-generational mixing between neolithic farmers and  
777 mesolithic hunter-gatherers in the lower danube basin. *Current Biology*, **27**(12), 1801–1810.
- 778 Green, R. E. *et al.* (2010). A draft sequence of the Neandertal genome. *Science*, **328**(5979), 710–722.
- 779 Günther, T. *et al.* (2015). Ancient genomes link early farmers from atapuerca in spain to modern-day basques.  
780 *Proceedings of the National Academy of Sciences*, **112**(38), 11917–11922.
- 781 Haber, M. *et al.* (2017). Continuity and admixture in the last five millennia of levantine history from ancient canaanite  
782 and present-day lebanese genome sequences. *The American Journal of Human Genetics*, **101**(2), 274–282.
- 783 Haber, M. *et al.* (2019). A transient pulse of genetic admixture from the crusaders in the near east identified from  
784 ancient genome sequences. *The American Journal of Human Genetics*, **104**(5), 977–984.
- 785 Handsaker, R. E. *et al.* (2011). Discovery and genotyping of genome structural polymorphism by sequencing on a  
786 population scale. *Nat Genet*, **43**(3), 269–276.
- 787 Handsaker, R. E. *et al.* (2015). Large multiallelic copy number variations in humans. *Nat Genet*, **47**(3), 296–303.
- 788 Hardwick, R. J. *et al.* (2011). A worldwide analysis of beta-defensin copy number variation suggests recent selection of  
789 a high-expressing defb103 gene copy in east asia. *Human mutation*, **32**(7), 743–750.
- 790 Ho, S. S. *et al.* (2020). Structural variation in the sequencing era. *Nature Reviews Genetics*, **21**(3), 171–189.
- 791 Hofmanová, Z. *et al.* (2016). Early farmers from across europe directly descended from neolithic aegeans. *Proceedings*  
792 *of the National Academy of Sciences*, **113**(25), 6886–6891.
- 793 Hsieh, P. *et al.* (2019). Adaptive archaic introgression of copy number variants and the discovery of previously unknown  
794 human genes. *Science*, **366**(6463).
- 795 Jones, E. R. *et al.* (2015). Upper palaeolithic genomes reveal deep roots of modern eurasians. *Nature communications*,  
796 **6**(1), 1–8.
- 797 Jones, E. R. *et al.* (2017). The neolithic transition in the baltic was not driven by admixture with early european farmers.  
798 *Current Biology*, **27**(4), 576–582.
- 799 Jun, G. *et al.* (2015). An efficient and scalable analysis framework for variant extraction and refinement from  
800 population-scale dna sequence data. *Genome research*, **25**(6), 918–925.
- 801 Kahveci, F. and Alkan, C. (2018). Whole-genome shotgun sequence CNV detection using read depth. *Methods in*  
802 *molecular biology*, **1833**, 61–72.



- 803 Karakoc, E. *et al.* (2012). Detection of structural variants and indels within exome data. *Nat Methods*, **9**(2), 176–178.
- 804 Karimzadeh, M. *et al.* (2018). Umap and Bismap: quantifying genome and methylome mappability. *Nucleic Acids*  
805 *Research*, **46**(20), e120–e120.
- 806 Keller, A. *et al.* (2012). New insights into the tyrolean iceman’s origin and phenotype as inferred by whole-genome  
807 sequencing. *Nature communications*, **3**(1), 1–9.
- 808 Kent, W. J. *et al.* (2002). The human genome browser at ucsc. *Genome research*, **12**(6), 996–1006.
- 809 Kılınç, G. M. *et al.* (2016). The demographic development of the first farmers in anatolia. *Current Biology*, **26**(19),  
810 2659–2666.
- 811 Kircher, M. (2012). Analysis of high-throughput ancient dna sequencing data. In *Ancient DNA*, pages 197–228.  
812 Springer.
- 813 Koehler, R. *et al.* (2011). The uniqueome: a mappability resource for short-tag sequencing. *Bioinformatics*, **27**(2),  
814 272–274.
- 815 Kothapalli, K. S. *et al.* (2016). Positive selection on a regulatory insertion–deletion polymorphism in fads2 influences  
816 apparent endogenous synthesis of arachidonic acid. *Molecular biology and evolution*, **33**(7), 1726–1739.
- 817 Kousathanas, A. *et al.* (2017). Inferring heterozygosity from ancient and low coverage genomes. *Genetics*, **205**(1),  
818 317–332.
- 819 Krzewińska, M. *et al.* (2018). Ancient genomes suggest the eastern pontic-caspian steppe as the source of western iron  
820 age nomads. *Science advances*, **4**(10), eaat4457.
- 821 Layer, R. M. *et al.* (2014). LUMPY: a probabilistic framework for structural variant discovery. *Genome Biol*, **15**(6),  
822 R84.
- 823 Lazaridis, I. *et al.* (2014). Ancient human genomes suggest three ancestral populations for present-day europeans.  
824 *Nature*, **513**(7518), 409–413.
- 825 Levy-Sakin, M. *et al.* (2019). Genome maps across 26 human populations reveal population-specific patterns of  
826 structural variation. *Nature communications*, **10**, 1025.
- 827 Li, H. and Durbin, R. (2009). Fast and accurate short read alignment with Burrows-Wheeler transform. *Bioinformatics*,  
828 **25**(14), 1754–1760.
- 829 Li, H. *et al.* (2009). The sequence alignment/map format and SAMtools. *Bioinformatics*, **25**(16), 2078–2079.
- 830 Link, V. *et al.* (2017). Atlas: analysis tools for low-depth and ancient samples. *BioRxiv*, page 105346.
- 831 Llorente, M. G. *et al.* (2015). Ancient ethiopian genome reveals extensive eurasian admixture in eastern africa. *Science*,  
832 **350**(6262), 820–822.
- 833 Marciniak, S. and Perry, G. H. (2017). Harnessing ancient genomes to study the history of human adaptation. *Nature*  
834 *Reviews Genetics*, **18**(11), 659–674.
- 835 Marsden, C. D. *et al.* (2016). Bottlenecks and selective sweeps during domestication have increased deleterious genetic  
836 variation in dogs. *Proceedings of the National Academy of Sciences*, **113**(1), 152–157.
- 837 Martiniano, R. *et al.* (2017). The population genomics of archaeological transition in west iberia: Investigation of  
838 ancient substructure using imputation and haplotype-based methods. *PLoS genetics*, **13**(7), e1006852.
- 839 Mathieson, S. and Mathieson, I. (2018). Fads1 and the timing of human adaptation to agriculture. *Molecular biology*  
840 *and evolution*, **35**(12), 2957–2970.
- 841 McLean, C. Y. *et al.* (2011). Human-specific loss of regulatory dna and the evolution of human-specific traits. *Nature*,  
842 **471**(7337), 216–219.
- 843 Meyer, M. *et al.* (2012). A high-coverage genome sequence from an archaic denisovan individual. *Science*, **338**(6104),  
844 222–226.

- 845 Miller, C. A. *et al.* (2011). ReadDepth: a parallel R package for detecting copy number alterations from short sequencing  
846 reads. *PloS one*, **6**, e16327.
- 847 Mittnik, A. *et al.* (2018). The genetic prehistory of the baltic sea region. *Nature communications*, **9**(1), 1–11.
- 848 Mu, J. C. *et al.* (2015). VarSim: a high-fidelity simulation and validation framework for high-throughput genome  
849 sequencing with cancer applications. *Bioinformatics*, **31**(9), 1469–1471.
- 850 Ng, P. C. and Henikoff, S. (2003). Sift: Predicting amino acid changes that affect protein function. *Nucleic acids*  
851 *research*, **31**(13), 3812–3814.
- 852 Nuttle, X. *et al.* (2016). Emergence of a homo sapiens-specific gene family and chromosome 16p11. 2 cnv susceptibility.  
853 *Nature*, **536**(7615), 205–209.
- 854 Oksanen, J. *et al.* (2013). Package ‘vegan’. *Community ecology package, version*, **2**(9), 1–295.
- 855 Olalde, I. *et al.* (2014). Derived immune and ancestral pigmentation alleles in a 7,000-year-old mesolithic european.  
856 *Nature*, **507**(7491), 225–228.
- 857 Oliva, A. *et al.* (2021). Bwa-mem is not the best aligner for ancient dna short reads. *bioRxiv*.
- 858 Orlando, L. *et al.* (2021). Ancient dna analysis. *Nature Reviews Methods Primers*, **1**(1), 1–26.
- 859 Patterson, N. *et al.* (2012). Ancient admixture in human history. *Genetics*, **192**(3), 1065–1093.
- 860 Pedersen, J. S. *et al.* (2014). Genome-wide nucleosome map and cytosine methylation levels of an ancient human  
861 genome. *Genome research*, **24**(3), 454–466.
- 862 Perry, G. H. *et al.* (2007). Diet and the evolution of human amylase gene copy number variation. *Nature genetics*,  
863 **39**(10), 1256–1260.
- 864 Pockrandt, C. *et al.* (2020). Genmap: ultra-fast computation of genome mappability. *Bioinformatics*.
- 865 Prüfer, K. (2018). snpad: An ancient dna genotype caller. *Bioinformatics*, **34**(24), 4165–4171.
- 866 Quinlan, A. R. and Hall, I. M. (2010). BEDTools: a flexible suite of utilities for comparing genomic features.  
867 *Bioinformatics*, **26**(6), 841–842.
- 868 R Core Team (2020). *R: A Language and Environment for Statistical Computing*. R Foundation for Statistical  
869 Computing, Vienna, Austria.
- 870 Raghavan, M. *et al.* (2014). Upper palaeolithic siberian genome reveals dual ancestry of native americans. *Nature*,  
871 **505**(7481), 87–91.
- 872 Rasmussen, M. *et al.* (2010). Ancient human genome sequence of an extinct palaeo-eskimo. *Nature*, **463**(7282),  
873 757–762.
- 874 Rasmussen, M. *et al.* (2014). The genome of a late pleistocene human from a clovis burial site in western montana.  
875 *Nature*, **506**(7487), 225–229.
- 876 Rausch, T. *et al.* (2012). DELLY: structural variant discovery by integrated paired-end and split-read analysis.  
877 *Bioinformatics*, **28**(18), i333–i339.
- 878 Reich, D. *et al.* (2010). Genetic history of an archaic hominin group from Denisova Cave in Siberia. *Nature*, **468**(7327),  
879 1053–1060.
- 880 Renaud, G. *et al.* (2017). gargammel: a sequence simulator for ancient dna. *Bioinformatics*, **33**(4), 577–579.
- 881 Rogers, R. L. and Slatkin, M. (2017). Excess of genomic defects in a woolly mammoth on wrangel island. *PLoS*  
882 *genetics*, **13**(3), e1006601.
- 883 Rohland, N. *et al.* (2015). Partial uracil–dna–glycosylase treatment for screening of ancient dna. *Philosophical*  
884 *Transactions of the Royal Society B: Biological Sciences*, **370**(1660), 20130624.
- 885 Saitou, M. and Gokcumen, O. (2020). An evolutionary perspective on the impact of genomic copy number variation on  
886 human health. *Journal of molecular evolution*, **88**(1), 104–119.

- 887 Schubert, M. *et al.* (2016). Adapterremoval v2: rapid adapter trimming, identification, and read merging. *BMC research*  
888 *notes*, **9**(1), 1–7.
- 889 Sedlazeck, F. J. *et al.* (2018). Accurate detection of complex structural variations using single-molecule sequencing.  
890 *Nature methods*, **15**, 461–468.
- 891 Seguin-Orlando, A. *et al.* (2014). Genomic structure in europeans dating back at least 36,200 years. *Science*, **346**(6213),  
892 1113–1118.
- 893 Shapiro, á. and Hofreiter, M. (2014). A paleogenomic perspective on evolution and gene function: new insights from  
894 ancient dna. *Science*, **343**(6169), 1236573.
- 895 Sikora, M. *et al.* (2019). The population history of northeastern siberia since the pleistocene. *Nature*, **570**(7760),  
896 182–188.
- 897 Skoglund, P. and Mathieson, I. (2018). Ancient genomics of modern humans: the first decade. *Annual review of*  
898 *genomics and human genetics*, **19**, 381–404.
- 899 Smith, D. R. *et al.* (2008). Rapid whole-genome mutational profiling using next-generation sequencing technologies.  
900 *Genome Res*, **18**(10), 1638–1642.
- 901 Smith, S. D. *et al.* (2015). Grom-rd: resolving genomic biases to improve read depth detection of copy number variants.  
902 *PeerJ*, **3**, e836.
- 903 Smith, S. D. *et al.* (2017). Evolutionary adaptation revealed by comparative genome analysis of woolly mammoths and  
904 elephants. *DNA Research*, **24**(4), 359–369.
- 905 Soylev, A. *et al.* (2017). Toolkit for automated and rapid discovery of structural variants. *Methods*, **129**, 3–7.
- 906 Soylev, A. *et al.* (2019). Discovery of tandem and interspersed segmental duplications using high-throughput sequencing.  
907 *Bioinformatics*, **35**, 3923–3930.
- 908 Stankiewicz, P. and Lupski, J. R. (2010). Structural variation in the human genome and its role in disease. *Annu Rev*  
909 *Med*, **61**, 437–455.
- 910 Sudmant, P. H. *et al.* (2010). Diversity of human copy number variation and multicopy genes. *Science*, **330**(6004),  
911 641–646.
- 912 Sudmant, P. H. *et al.* (2015a). Global diversity, population stratification, and selection of human copy-number variation.  
913 *Science*, **349**(6253).
- 914 Sudmant, P. H. *et al.* (2015b). An integrated map of structural variation in 2,504 human genomes. *Nature*, **526**(7571),  
915 75–81.
- 916 The 1000 Genomes Project Consortium (2015). A global reference for human genetic variation. *Nature*, **526**(7571),  
917 68–74.
- 918 Vieira, F. G. *et al.* (2016). Estimating ibd tracts from low coverage ngs data. *Bioinformatics*, **32**(14), 2096–2102.
- 919 Warnes, G. R. *et al.* (2020). *gplots: Various R Programming Tools for Plotting Data*. R package version 3.1.1.
- 920 Wickham, H. (2016). *ggplot2: Elegant Graphics for Data Analysis*. Springer-Verlag New York.
- 921 Xie, C. and Tammi, M. T. (2009). Cnv-seq, a new method to detect copy number variation using high-throughput  
922 sequencing. *BMC bioinformatics*, **10**(1), 1–9.
- 923 Xue, Y. *et al.* (2008). Adaptive evolution of ugt2b17 copy-number variation. *The American Journal of Human Genetics*,  
924 **83**(3), 337–346.
- 925 Yaka, R. *et al.* (2021). Variable kinship patterns in neolithic anatolia revealed by ancient genomes. *Current Biology*,  
926 **31**(11), 2455–2468.
- 927 Yoon, S. *et al.* (2009). Sensitive and accurate detection of copy number variants using read depth of coverage. *Genome*  
928 *Res*, **19**(9), 1586–1592.
- 929 Zhang, F. *et al.* (2009). Copy number variation in human health, disease, and evolution. *Annual review of genomics and*  
930 *human genetics*, **10**, 451–481.
- 931 Zook, J. M. *et al.* (2020). A robust benchmark for detection of germline large deletions and insertions. *Nature*  
932 *Biotechnology*, pages 1–9.
